1 **Cell-extrinsic autophagy in mature adipocytes regulates anti-inflammatory response to intestinal**  
2 **tissue injury through lipid mobilization**

3 Felix Clemens Richter<sup>1</sup>, Matthias Friedrich<sup>1,2</sup>, Mathilde Pohin<sup>1,\*</sup>, Ghada Alsaleh<sup>1,\*</sup>, Irina Guschina<sup>3</sup>,  
4 Sarah Karin Wideman<sup>4</sup>, Errin Johnson<sup>5</sup>, Mariana Borsa<sup>1</sup>, Klara Piletic<sup>1</sup>, Paula Hahn<sup>1</sup>, Henk Simon  
5 Schipper<sup>1,6</sup>, Claire M. Edwards<sup>7,8</sup>, Fiona Powrie<sup>1</sup>, Anna Katharina Simon<sup>1,#</sup>

6

7 \*Authors contributed equally.

8 #Corresponding author: [katja.simon@imm.ox.ac.uk](mailto:katja.simon@imm.ox.ac.uk)

9

10

11 *Affiliations*

12 <sup>1</sup> Kennedy Institute of Rheumatology, Roosevelt Drive, OX3 7FY, Oxford, United Kingdom

13 <sup>2</sup> Translational Gastroenterology Unit, John Radcliffe Hospital, Nuffield Department of Medicine, University  
14 of Oxford, Headley Way, OX3 9DU, Oxford, United Kingdom

15 <sup>3</sup> School of Biosciences, Cardiff University, Cardiff CF10 3AX, United Kingdom

16 <sup>4</sup> MRC Human Immunology Unit, MRC Weatherall Institute of Molecular Medicine, University of Oxford,  
17 John Radcliffe Hospital, Oxford, United Kingdom

18 <sup>5</sup> The Dunn School of Pathology, South Parks Road, Oxford OX1 3RE, United Kingdom

19 <sup>6</sup> Center for Translational Immunology, University Medical Center Utrecht, The Netherlands

20 <sup>7</sup> Nuffield Department of Orthopaedics, Rheumatology and Musculoskeletal Sciences, Botnar Research  
21 Centre, OX3 7LD, Oxford, United Kingdom

22 <sup>8</sup> Nuffield Department of Surgical Sciences, Botnar Research Centre OX3 7LD, Oxford, United Kingdom

23 ***Summary***

24 Autophagy is a critical cellular recycling pathway which is genetically linked to the development of  
25 intestinal inflammation in humans. Inflammation drives adipose tissue breakdown and provision of  
26 major nutrients such as free fatty acids (FFA). However, the effect of autophagy-mediated FFA release  
27 by adipocytes in immune-mediated inflammatory diseases remains unexplored.

28 In a mouse model of intestinal inflammation, we found that visceral adipocytes upregulate autophagy  
29 at peak inflammation. Adipocyte-specific loss of the key autophagy gene *Atg7* (*Atg7<sup>Ad</sup>*) resulted in the  
30 exacerbation of intestinal inflammation. TNF $\alpha$ -induced lipolysis was impaired in *Atg7*-deficient  
31 adipocytes leading to the reduced availability of several FFA species, and decreased expression of the  
32 FFA transporter CD36 on adipose tissue macrophages (ATMs). Visceral adipose tissues from *Atg7<sup>Ad</sup>*  
33 mice released less IL-10 resulting in lower levels of circulating IL-10 in colitis. ATMs present the main  
34 source of adipose tissue-derived IL-10 during colitis. *In vitro* assays confirmed that FFA restriction from  
35 macrophages reduced CD36 expression and diminished IL-10 production.

36 Taken together, our study demonstrates that autophagy-mediated FFA release from adipocytes directs  
37 anti-inflammatory responses in ATMs, which in turn conveys protective effects for distant intestinal  
38 inflammation.

39

40

41 **Key words:** Adipose Tissue, Macrophage, Autophagy, IBD, Colitis, Adipocyte, IL-10

42 **Introduction**

43 Autophagy is an essential cellular recycling pathway that engulfs cellular contents, including organelles  
44 and macromolecules, in a double membraned autophagosome and directs them towards lysosomal  
45 degradation. The released nutrients can then be used for both biosynthetic building blocks and energy  
46 generation (Riffelmacher et al., 2018). Immune cells are cell-intrinsically reliant on autophagy during  
47 their differentiation and for their immune functions (Clarke and Simon, 2019). For instance, neutrophils  
48 require autophagy for the liberation of free fatty acids (FFA) from their intracellular lipid droplet stores  
49 in order to generate energy through oxidative phosphorylation (Riffelmacher et al., 2017). Similarly,  
50 autophagy-deficient macrophages are arrested in a glycolytic metabolic program promoting expression  
51 of pro-inflammatory cytokines and reactive oxygen species (Kang et al., 2016; Stranks et al., 2015).

52 While the cell-intrinsic need for recycled nutrients is evident, whether these mobilized nutrients can also  
53 be provided to immune cells in an autophagy-dependent manner remains less well understood. In  
54 plants, nutrients recycled via autophagy are mobilized to other plant organs or stored in seeds  
55 (Guiboileau et al., 2013; Guiboileau et al., 2012). In animals, only a few pioneering studies have looked  
56 at the mobilization of nutrients, in particular amino acids. For instance, autophagy in non-cancer cells  
57 control amino acid availability and thus tumour growth (Katheder et al., 2017; Poillet-Perez et al., 2018;  
58 Sousa et al., 2016). Activation of autophagy in hepatic stellate cells by the cancer cell induces the  
59 release and provision of alanine to the cancer cell (Sousa et al., 2016). Despite mounting evidence for  
60 autophagy-dependent amino acid mobilization, it remains unclear whether this also exists for other  
61 nutrients such as FFA.

62 Adipocytes are highly specialized cells responsible for the conversion and storage of energy-rich  
63 nutrients in form of lipids and for their release during times of high nutrient demand. In addition, the  
64 adipose tissue represents an important immunological organ harbouring a variety of immune cells,  
65 which are highly adapted to live in lipid-rich environments, such as macrophages (Grant and Dixit,  
66 2015). Lean adipose tissues are predominantly populated by tissue-resident M2-type macrophages,  
67 while inflammation as induced by obesity, subverts their tissue homeostatic functions and promotes  
68 pro-inflammatory M1-type polarization (Russo and Lumeng, 2018). M2-type macrophages require the  
69 uptake of exogenous lipids through CD36 expression and subsequently increase fatty acid oxidation-  
70 based metabolism (Huang et al., 2014). To-date, little is known about the function and reaction of

71 adipose tissue macrophages (ATMs) to other inflammatory conditions in metabolically healthy animals.  
72 In the context of osteoarthritis, adipose tissues were recently shown to contribute to inflammation and  
73 disease progression (Collins et al., 2021). This demonstrates an existing inter-tissue crosstalk of  
74 adipose tissues with distal tissue sites in immune-mediated inflammation.

75 Inflammatory bowel diseases (IBD) including its two predominant forms, Crohn's disease (CD) and  
76 ulcerative colitis (UC), describe a complex spectrum of intestinal inflammation. Epidemiological studies  
77 linked mutations in autophagy-related genes to an increased susceptibility for the development of IBD,  
78 in particular CD (Hampe et al., 2007; Jostins et al., 2012; McCarroll et al., 2008). Mechanistic studies  
79 showed that ablation of autophagy in immune and epithelial cells promotes intestinal inflammation  
80 (Cadwell et al., 2008; Cadwell et al., 2009; Kabat et al., 2016). In addition to the strong genetic  
81 association of autophagy and IBD, CD patients often present with an expansion of the mesenteric  
82 adipose tissue around the inflamed intestine, indicating an active involvement of the adipose tissue in  
83 the disease pathology (Sheehan et al., 1992).

84 Here, we sought to investigate the cell-extrinsic impact of adipocyte autophagy on the immune system  
85 during inflammation of a distant organ, the large intestine. We observed that autophagy is induced in  
86 mature adipocytes upon intestinal tissue injury, and that loss of autophagy, specifically in adipocytes,  
87 exacerbates the intestinal inflammation response to dextran sulphate sodium (DSS). Mechanistically,  
88 autophagy in mature adipocytes is required for the optimal release of FFA during inflammation. Local  
89 FFA restriction results in a limited production of IL-10 from ATMs, aggravating intestinal inflammation.

90 Taken together, we demonstrate for the first time that adipocytes employ autophagy for lipid  
91 mobilization to promote the anti-inflammatory function of ATMs in order to control immune exacerbation  
92 at a distant organ.

93

## 94 **Materials and Methods**

### 95 **Mice**

96 *Adipoq-CreERT2* mice (Sassmann et al., 2010) were purchased from Charles River, UK (JAX stock  
97 number: 025124) and were crossed to *Atg7* floxed mice (Komatsu et al., 2005). Experimental cages  
98 were sex- and age-matched and balanced for genotypes. Genetic recombination was induced at 8-10  
99 weeks of age by oral gavage of 4mg tamoxifen per mouse for five consecutive days. All experimental  
100 procedures were conducted two weeks after last tamoxifen administration (Figure 2A). Wild-type  
101 C57BL/6J mice were purchased from Charles River, UK (JAX stock number: 0000664) or bred in-  
102 house. Mice were housed on a 12-hour dark/light cycle and fed *ad libitum*, under specific pathogen-free  
103 conditions. All animal experimentation was performed in accordance to approved procedures by the  
104 Local Review Committee and the Home Office under the project licence (PPL30/3388 and P01275425).

105

### 106 **Murine models of intestinal inflammation**

107 DSS-induced colitis was induced by 1.5-2% (w/v) DSS (MP Biomedicals, 160110) in drinking water.  
108 Mice were treated with DSS for five days and assessed at day 7, a peak inflammation time (Figure 1A),  
109 or at day 14, a resolution time point (Figure S3A). For *Helicobacter hepaticus* anti-IL10 receptor-induced  
110 colitis (Danne et al., 2017), mice were injected with 50mg/kg anti-IL-10 receptor antibody (clone 1B1.2,  
111 2BScientific) intraperitoneally on day 0 and day 7 of the experiment. *H. hepaticus* was orally  
112 administered ( $1 \times 10^8$  colony forming units per mouse) by gavage for two consecutive days at day 0 and  
113 1 of the experiment (Figure S4A). Uninfected control animals were kept in separate cages on the same  
114 rack. During intestinal inflammation experiments, we grouped water-treated *Atg7<sup>Ad</sup>* and wild-type  
115 littermate controls combined to visualize baseline levels.

116

### 117 **Histopathology assessment**

118 Distal, mid and proximal colon pieces were fixed in 10% neutral buffered formalin for 24 hours before  
119 washed and transferred into 70% ethanol. Tissue pieces from each sample were embedded in the same  
120 paraffin block and 5 $\mu$ m sections were subsequently stained with haematoxylin and eosin (H&E). Scoring  
121 of histology sections was executed in a blinded fashion according to a previously reported scoring  
122 system (Dieleman et al., 1998). In brief, each section was assessed for the degree inflammation, the

123 depth of tissue damage, possible crypt damages, with high scores signifying increased tissue damage.  
124 In addition, signs of regeneration were assessed, with high scores indicating delayed regeneration.  
125 Changes were multiplied with a factor classifying the involvement tissue area.

126

#### 127 Adipose tissue and colon digestion

128 We collected mesenteric adipose tissue separate from a collective set of visceral adipose tissue depots  
129 (including omental, gonadal and retroperitoneal adipose tissue) to distinguish proximal versus distal  
130 effects of intestinal inflammation on adipose tissues. Adipose tissues were collected and digested in  
131 DMEM containing 1% fatty acid-free BSA (Sigma, 126609), 5% HEPES (Gibco, 15630-056), 0.2mg/mL  
132 Liberase TL (Roche, 5401020001) and 20 $\mu$ g/mL DNaseI (Roche, 11284932001). Tissues were minced  
133 in digestion medium and incubated for 25-30min at 37°C at 180rpm. Tissues were further broken down  
134 by pipetting using wide-bore tips and filtered through a 70 $\mu$ m mesh. Digestion was quenched by adding  
135 medium containing 2mM EDTA. Adipocyte and stromal vascular fraction were separated by  
136 centrifugation (700g, 10min) and collected for further downstream analysis.

137 Colon digestions were performed as previously described (Danne et al., 2017). Colons were opened  
138 longitudinally and faecal content was removed by washing with PBS. Then colons were washed twice  
139 in RPMI containing 5% FBS and 5mM EDTA at 37°C under agitation. Tissues were minced and digested  
140 in RPMI supplemented with 5% FBS, 1mg/mL collagenase type VIII (Sigma) and 40 $\mu$ g/mL DNaseI  
141 (Roche). Cell suspension was strained through 40 $\mu$ m mesh and cells were subjected to downstream  
142 analysis.

143

#### 144 Flow Cytometry

145 Flow cytometry staining was performed as previously described (Riffelmacher et al., 2017). Surface  
146 staining was performed by incubating cells with fluorochrome-conjugated antibodies (Biolegend, BD  
147 Bioscience, eBioscience) and LIVE/DEAD Fixable Stains (ThermoFischer) for 20min at 4°C. Cells were  
148 fixed with 4% PFA for 10min at room temperature. For intracellular staining of transcription factors, cells  
149 were fixed/permeabilized using the eBioscience™ Foxp3/ Transcription Factor Staining Set (00-5523-  
150 00, Invitrogen). For cytokine staining, cells were stimulated using Cell Activation cocktail (Biolegend)  
151 for 4h at 37°C in RPMI containing 10% FBS. After surface staining, cells were fixed and stained in

152 Cytotfix/CytoPerm (BD Bioscience) following manufacturer protocol. Samples were acquired on LSRII  
153 or Fortessa X-20 flow cytometers (BD Biosciences).

154

#### 155 Quantitative PCR

156 Adipocytes and adipose tissue RNA were extracted using TRI reagent (T9424, Sigma). Colon tissue  
157 RNA were extracted in RLT buffer containing 1,4-Dithiothreitol. Tissues were homogenised by lysis in  
158 2mL tubes containing ceramic beads (KT03961-1-003.2, Bertin Instruments) using a Precellys 24  
159 homogenizer (Bertin Instruments). RNA was purified following RNeasy Mini Kit (74104, Qiagen)  
160 manufacturer instructions. cDNA was synthesized following the High-Capacity RNA-to-cDNA™ kit  
161 protocol (4388950, ThermoFischer). Gene expression was assessed using validated TaqMan probes  
162 and run on a ViiA7 real-time PCR system. All data were collected by comparative Ct method either  
163 represented as relative expression ( $2^{-\Delta Ct}$ ) or fold change ( $2^{-\Delta\Delta Ct}$ ). Data were normalized to the two most  
164 stable housekeeping genes; for adipose tissues *Tbp* and *Rn18s* and for colon *Actb* and *Hprt*.

165

#### 166 Bulk RNA sequencing

167 Visceral adipocytes were isolated as floating fraction upon digestion. RNA was extracted and converted  
168 to cDNA as described above. PolyA libraries were prepared through end reparation, A-tailing and  
169 adapter ligation. Samples were then size-selected, multiplexed and sequenced using a NovaSeq6000.  
170 Raw read quality control was performed using pipeline readqc.py ([https://github.com/cgat-](https://github.com/cgat-developers/cgat-flow)  
171 [developers/cgat-flow](https://github.com/cgat-developers/cgat-flow)). Resulting reads were aligned to GRCm38/Mm10 reference genome using the  
172 pseudoalignment method kallisto (Bray et al., 2016). Differential gene expression analysis was  
173 performed using DEseq2 v1.30.1 (Love et al., 2014). Pathway enrichment analysis was performed on  
174 differentially expressed genes for “Biological Pathways” using clusterProfiler (v4.0) R package (Wu et  
175 al., 2021). Heatmaps of selected gene sets were presented as z-scores using R package pheatmap. R  
176 code is available under <https://github.com/cleete/IBD-Adipocyte-Autophagy>

177

#### 178 Shotgun lipidomics

179 Serum lipidomics were performed using Shotgun Lipidomics platform by LipoType GmbH (Dresden,  
180 Germany), as described previously (Surma et al., 2015). In brief, serum lipids were isolated using methyl

181 tert-butyl ether and methanol extraction and lipid class specific internal standards were added. Extracts  
182 were analysed by mass spectrometry on a hybrid quadrupole/Orbitrap mass spectrometer. Lipid  
183 identification was performed through LipotypeXplorer software. Data was stratified according to mass  
184 accuracy, occupation threshold, noise, background and then normalized. Lipid standards were used for  
185 quantification. Values were returned when falling into lipid standard and coefficient variation for each  
186 lipid class. Lipids with missing values (due to failed GC or subthreshold) were removed from analysis.  
187 Dataset was analysed in R and code is available under: [https://github.com/cleete/IBD-Adipocyte-](https://github.com/cleete/IBD-Adipocyte-Autophagy)  
188 [Autophagy](#)

189

#### 190 Lipolysis assays

191 Adipose tissues were collected and washed in PBS before subjected to lipolysis assays. For  
192 isoproterenol stimulation, adipose tissues were cut into small tissue pieces and incubated in serum-free  
193 DMEM - High Glucose (Sigma, D5796) with 2% fatty acid-free BSA (Sigma, 126579) in the absence or  
194 presence of 10 $\mu$ M isoproterenol (Sigma, I6504) for the indicated time. TNF $\alpha$ -induced lipolysis was  
195 induced as previously described (Ju et al., 2019). In brief, small adipose tissue pieces were cultured in  
196 DMEM – High Glucose for 24 hours in the absence or presence of 100ng/mL recombinant TNF $\alpha$   
197 (Peprotech, 315-01A) and then transferred into serum-free DMEM containing 2% fatty acid free BSA  
198 for 3 hours. Supernatants were collected and FFA concentration normalized to adipose tissue input.

199

#### 200 Free fatty acid analysis

201 Total supernatant and serum FFA levels were measured using Free Fatty Acid Assay Quantification Kit  
202 (ab65341, Abcam). For detailed analysis of FFA species, lipids were extracted by Folch's method (Folch  
203 et al., 1957) and subsequently run on a one-dimensional thin layer chromatography (TLC) using a  
204 10x10cm silica gel G plate in a hexane/diethyl ether/acetic acid (80:20:1, by vol.) solvent system.  
205 Separated FFA were used for fatty acid methyl esters (FAMES) preparation through addition of 2.5%  
206 H<sub>2</sub>SO<sub>4</sub> solution in dry methanol/toluene (2:1 (v/v)) at 70°C for 2h. A known amount of C17:0 was added  
207 as an internal standard for quantification. FAMES were extracted with HPLC grade hexane. A Clarus  
208 500 gas chromatograph with a flame ionizing detector (FID) (Perkin-Elmer) and fitted with a 30m x  
209 0.25mm i.d. capillary column (Elite 225, Perkin Elmer) was used for separation and analysis of FAs.



210 The oven temperature was programmed as follows: 170°C for 3min, increased to 220°C at 4°C/min),  
211 and then held at 220°C for 15min. FAMES were identified routinely by comparing retention times of  
212 peaks with those of G411 FA standards (Nu-Chek Prep Inc). TotalChrom software (Perkin-Elmer) was  
213 used for data acquisition and quantification.

214

### 215 Immunoblotting

216 Autophagic flux in adipose tissues was measured by incubating adipose tissue explants from  
217 experimental animals in RPMI in the absence or presence of lysosomal inhibitors 100nM Bafilomycin  
218 A1 and 20mM NH<sub>4</sub>Cl for 4 hours. DMSO was used as 'vehicle' control. Adipose tissues were collected  
219 and snap frozen. Protein extraction was performed as previously described (An and Scherer, 2020). In  
220 brief, 500μL of lysis buffer containing protease inhibitors (04693159001, Roche) and phosphoStop  
221 (04906837001, Roche) were added per 100mg of tissue. Cells were lysed using Qiagen TissueLyser  
222 II. Tissues were incubated on ice for 1h and lipid contamination was removed via serial centrifugation  
223 and transfer of supernatant into fresh tubes. Protein concentration was determined by BCA Protein Assay  
224 Kit (23227, Thermo Scientific). Total of 15-30μg protein were separated on a 4-12% Bis-Tris SDS PAGE  
225 and transferred using BioRad Turbo Blot (1704156, BioRad) onto PVDF membrane. Membranes were  
226 blocked in TBST containing 5% milk. Primary antibodies were used at indicated concentration  
227 overnight. Membranes were visualized using IRDye secondary antibodies (LICOR). Band quantification  
228 of Western Blots was performed on ImageJ. Autophagic flux was calculated as: (LC3-II (Inh) – LC3-II  
229 (Veh))/(LC3-II (Veh)), as previously described (Zhang et al., 2019).

230

### 231 Transmission electron microscopy

232 Mice were sacrificed by increasing concentrations of CO<sub>2</sub>. Adipose tissues were excised, cut into small  
233 1-2mm pieces and immediately fixed in pre-warmed (37 °C) primary fixative containing 2.5%  
234 glutaraldehyde and 4% formaldehyde in 0.1M sodium cacodylate buffer, pH7.2 for 2 hours at room  
235 temperature and then stored in the fixative at 4 °C until further processing. Samples were then washed  
236 for 2x 45 min in 0.1M sodium cacodylate buffer (pH 7.2) at room temperature with rotation, transferred  
237 to carrier baskets and processed for EM using a Leica AMW automated microwave processing unit.  
238 Briefly, this included three washes with 0.1M sodium cacodylate buffer, pH 7.2, one wash with 50mM

239 glycine in 0.1M sodium cacodylate buffer to quench free aldehydes, secondary fixation with 1% osmium  
240 tetroxide + 1.5% potassium ferricyanide in 0.1M sodium cacodylate buffer, six water washes, tertiary  
241 fixation with 2% uranyl acetate, two water washes, then dehydration with ethanol from 30%, 50%, 70%,  
242 90%, 95% to 100% (repeated twice). All of these steps were performed at 37 °C and 15-20W for 1-2  
243 mins each, with the exception of the osmium and uranyl acetate steps, which were for 12 min and 9  
244 min respectively. Samples were infiltrated with TAAB Hard Plus epoxy resin to 100% resin in the AMW  
245 and then processed manually at room temperature for the remaining steps. Samples were transferred  
246 to 2ml tubes filled with fresh resin, centrifuged for ~2mins at 2000g (to help improve resin infiltration),  
247 then incubated at room temperature overnight with rotation. The following day, the resin was removed  
248 and replaced with fresh resin, then the samples were centrifuged as above and incubated at room  
249 temperature with rotation for ~3 hrs. This step was repeated and then tissue pieces were transferred to  
250 individual Beem capsules filled with fresh resin and polymerised for 48 hrs at 60 °C. Once polymerised,  
251 blocks were sectioned using a Diatome diamond knife on a Leica UC7 Ultramicrotome. Ultrathin (90nm)  
252 sections were transferred onto 200 mesh copper grids and then post-stained with lead citrate for 5 mins,  
253 washed and air dried. Grids were imaged with a Thermo Fisher Tecnai 12 TEM (operated at 120 kV)  
254 using a Gatan OneView camera.

255

#### 256 Extracellular cytokine measurements

257 Serum samples were collected by cardiac puncture and collected in Microtainer tubes (365978, BD  
258 Bioscience). Samples were centrifuged for 90sec at 15,000g and serum aliquots were snap-frozen until  
259 further analysis. Global inflammatory cytokine analysis of supernatants of adipose tissue explant  
260 cultures and serum were performed using LEGENDplex™ Mouse Inflammation Panel (740446,  
261 Biolegend). TNF $\alpha$  and IL-10 levels were measured by TNF $\alpha$  Mouse Uncoated ELISA Kit (88-7324-86,  
262 Invitrogen) and IL-10 Mouse Uncoated ELISA Kit (88-7105-86, Invitrogen), respectively.

263

#### 264 Bone marrow macrophage culture

265 Bone marrow macrophages were differentiated as previously described (Fischer et al., 2021). In brief,  
266 BM were flushed and differentiated over 7 days in RPMI supplemented with 100ng/mL M-CSF (315-02,  
267 Peprotech). Cells were seeded at day 7 and polarized for 16 hours the following day using: 100ng/mL

268 M-CSF, 100ng/mL IFN $\gamma$  (315-05, Peprotech), 100ng/mL LPS (L8274, Sigma). Supernatant and cells  
269 were collected for subsequent flow cytometry and/or ELISA analysis.

270

### 271 Statistical Analysis

272 Data were tested for normality before applying parametric or non-parametric testing. For two groups  
273 unpaired Student's test or Mann-Whitney test were applied. Comparisons across more than two  
274 experimental groups were performed using One-Way or Two-Way ANOVA with Šídák multiple testing  
275 correction. Data were considered statistically significant when  $p < 0.05$  (\* $p < 0.05$ , \*\* $p < 0.01$ , \*\*\* $p < 0.001$ ,  
276 \*\*\*\* $p < 0.0001$ ). Typically, data were pooled from at least two experiments, if not otherwise indicated,  
277 and presented as mean  $\pm$  SEM. Serum lipidomics were analysed based on a linear regression model  
278 and subsequent multiple t-testing. Data was visualized and statistics calculated in either GraphPad  
279 Prism 9 or R software.

280

281 ***Results***

282 *DSS-induced intestinal inflammation promotes autophagy in adipose tissues*

283 To investigate whether autophagy in mature adipocytes is altered in response to intestinal inflammation,  
284 we deployed a mouse model of intestinal inflammation evoked by the administration of 1.5-2% DSS in  
285 drinking water (Figure 1A). As expected, treatment with DSS damaged the colonic epithelial architecture  
286 and triggered intestinal inflammation, as measured by body weight loss (Figure 1B), increased  
287 histopathological inflammation score (Figure S1A), shortened colon length (Figure S1B) and enlarged  
288 mesenteric lymph nodes (Figure S1C). In addition, DSS treatment resulted in a significantly higher  
289 infiltration of immune cells in the inflamed colon, which appeared to be predominantly of myeloid origin  
290 (Figure S1D-E). Next, we assessed the impact of DSS-induced colitis on the adipose tissue. In line with  
291 body weight loss, visceral adipose tissue mass was reduced (Figure 1C), as were serum FFA levels  
292 seven days after initial DSS administration (Figure 1D).

293 To assess changes in autophagy levels, adipose tissue explants from water- or DSS-treated animals  
294 were cultured in the absence or presence of lysosomal inhibitors and the accumulation of the lipidated  
295 autophagosomal marker LC3 protein (LC3-II) was quantified. DSS-induced intestinal inflammation  
296 substantially increased autophagic flux in mesenteric and in gonadal white adipose tissue (mWAT and  
297 gWAT, respectively) (Figure 1E), indicating that both adipose tissues proximal and distal to the intestine  
298 are responsive to the inflammation. Although this data suggests that autophagy in the adipose tissue is  
299 induced during colitis, several cell types, including adipose tissue immune cells, could be responsible  
300 for this change. To validate that adipocytes contribute to the increased autophagic flux in the adipose  
301 tissue, we first prepared adipose tissue for transmission electron microscopy. Autophagosomal double  
302 membrane structures were identified in adipocytes, predominantly from DSS-treated mice (Figure 1F).  
303 Additionally, we digested the adipose tissues and enriched for a floating adipocyte fraction and a  
304 pelleted stromal vascular fraction (SVF). Adipocyte fractions showed increased transcript levels of  
305 several *Atg8* homologues in DSS colitis, further demonstrating an increase in autophagic flux in this cell  
306 type (Figure 1G). In contrast, SVF containing adipose tissue-resident immune cells showed no  
307 transcriptional changes in *Atg8* expression (Figure 1G). Overall, these results indicate that autophagy  
308 is induced in adipocytes in response to DSS-induced colitis.

309

310 *Loss of adipocyte autophagy does neither alter systemic nor intestinal immune homeostasis*

311 Next, we addressed whether loss of autophagy in adipocytes affects immune development and  
312 intestinal inflammation at steady state. Given the crucial role of adipocyte autophagy during  
313 adipogenesis (Singh et al., 2009; Zhang et al., 2009) and to ensure normal adipocyte tissue formation,  
314 we established a tamoxifen-inducible knockout mouse model to ablate the essential autophagy gene  
315 *Atg7* specifically in mature adipocytes (*Atg7<sup>Ad</sup>*) (Figure 2A). We first confirmed efficient deletion of *Atg7*  
316 and disruption of autophagic flux. Activation of Cre nuclear translocation by tamoxifen administration  
317 led to the significant reduction of *Atg7* transcript levels in visceral adipocytes (Figure 2B). This deletion  
318 was further confirmed on the protein level (Figure 2C). Importantly, the adipocyte-specific loss of ATG7  
319 resulted in the interruption of conversion of LC3-I to LC3-II in the adipose tissue (Figure 2C), thus  
320 confirming effective disruption of the autophagic process in the adipose tissue.

321 Over the two-week time period, body weight development as well as adipose tissue mass remained  
322 unchanged between *Atg7<sup>Ad</sup>* and littermate controls (Figure S2A-B). In line with this, adipocyte  
323 autophagy loss under homeostatic conditions did not alter immune cell frequencies in the gut-  
324 associated mesenteric and in a collection of gut-distal visceral adipose tissues (Figure S2D). Further  
325 characterization of immune cells in mesenteric and visceral adipose tissues (Figure S2C,F) showed  
326 that loss of adipocyte autophagy did not significantly alter neither myeloid (Figure S2E) nor lymphoid  
327 compartments (Figure S2G). CD206-expressing macrophages were still found as the predominant  
328 myeloid cell subset (Figure S2E) and frequencies of B and T lymphocytes (Figure S2G) and specific T  
329 cell populations remained unaltered after loss of adipocyte ATG7 (Figure S2H). Overall, the data  
330 suggest that adipocyte autophagy does not change the immune cell populations found in the adipose  
331 tissue of unchallenged mice.

332 Since several autophagy related genes have been associated with the development of spontaneous  
333 colitis (Cadwell et al., 2009), we further investigated whether adipocyte autophagy loss would influence  
334 intestinal morphology and immune cell composition. Morphologically, colons from wild-type and *Atg7<sup>Ad</sup>*  
335 mice were comparable in length, and histopathological analysis did not reveal any contribution of  
336 adipocyte autophagy loss to inflammation (Figure 2D-E). In addition, total colonic immune cells  
337 frequencies and numbers remained unaltered (Figure 2F). Detailed immune cell profiling and  
338 histopathology did not reveal any impact of adipocyte autophagy loss on intestinal immune homeostasis

339 (Figure 2G-H). Taken together, adipocyte autophagy loss does not lead to the development of  
340 spontaneous colitis and immune cell populations in the intestine remained unaffected.

341

### 342 *Loss of adipocyte autophagy exacerbates barrier damage-induced intestinal inflammation*

343 Given that adipocyte autophagy is upregulated during DSS-induced intestinal inflammation, we next  
344 sought to determine the effects of autophagy loss in adipocytes during colitis. Since we were unable to  
345 find differences at homeostasis between the genotypes, we grouped both wild type and *Atg7<sup>Ad</sup>*  
346 tamoxifen-treated homeostatic mice an untreated control group. Upon DSS-treatment (Figure 3A),  
347 *Atg7<sup>Ad</sup>* mice showed increased body weight loss in comparison to littermate controls (Figure 3B). In  
348 addition, adipocyte autophagy-deficient mice treated with DSS showed a significant shortening of the  
349 colon when compared to their wild-type littermates during acute inflammation (Figure 3C). Blinded  
350 histopathological assessment confirmed that DSS-treated *Atg7<sup>Ad</sup>* mice exhibited more severe tissue  
351 damage in all parts of the colon, significantly increased inflammation, and delayed regeneration (Figure  
352 3D). Furthermore, we found increased gene expression of alarmins such as *I1a* and *I133*, pro-  
353 inflammatory cytokines *Tnfa*, *Ptx3*, *Ilng* and *Cxcl9* in *Atg7<sup>Ad</sup>* mice (Figure 3E). Although total CD45+  
354 immune cells numbers were comparable between adipocyte autophagy-deficient mice and littermate  
355 controls (Figure 3F), DSS-inflamed *Atg7<sup>Ad</sup>* mice showed an increased frequency of monocytes  
356 infiltrating the intestinal tissue (Figure 3G). In particular, the number of MHCII-expressing, inflammatory  
357 monocytes were increased in the lamina propria of *Atg7<sup>Ad</sup>* mice (Figure 3H). Taken together, these data  
358 demonstrate that loss of adipocyte autophagy exacerbates intestinal inflammation in the acute phase  
359 of DSS-induced colitis.

360 Intestinal inflammation induced by DSS is self-resolving (Ho et al., 2021). Therefore, we assessed the  
361 impact of adipocyte autophagy loss two weeks after DSS induction (Figure S3A). At this timepoint, we  
362 were unable to find any differences in colon length between *Atg7<sup>Ad</sup>* and littermate controls and equally  
363 there were no significant histopathological differences observed between the groups (Figure S3B-C).  
364 While induction of colitis is lymphocyte-independent, it has been suggested that its resolution is also  
365 controlled by lymphocytes (Wang et al., 2015). Interestingly, frequencies and total numbers of colonic  
366 FOXP3+ regulatory T cells (Tregs) were decreased in adipocyte autophagy-deficient animals compared  
367 to wild-type animals (Figure S3D), despite not affecting disease recovery. Intestinal FOXP3+ Tregs are

368 classified into three distinct subsets based on co-expression of TH<sub>2</sub> and TH<sub>17</sub> transcription factors  
369 GATA3<sup>+</sup> and RORγt<sup>+</sup>, respectively (Whibley et al., 2019). While all populations tended to be diminished  
370 in *Atg7<sup>Ad</sup>* mice, only RORγt<sup>+</sup> FOXP3<sup>+</sup> Tregs were significantly reduced (Figure S3E). This suggests that  
371 adipocyte autophagy does not interfere with the resolution of intestinal inflammation.

372 To further delineate the impact of adipocyte autophagy on intestinal inflammation, we next assessed its  
373 impact in another model of colitis. To this end, mice were treated with the pathobiont *Helicobacter*  
374 *hepaticus* (*Hh*) by oral gavage and co-administration of IL-10 receptor blocking antibody allowed for  
375 breakage of intestinal immune tolerance to *Hh* (Danne et al., 2017). We measured the effects of  
376 adipocyte autophagy loss at both peak inflammation and resolution stages, at 2 and 6 weeks post-*Hh*  
377 infection, respectively (Figure S4A). Deletion of adipocyte autophagy did not affect colon histopathology  
378 in *Hh*-induced animals at either time point (Figure S4B). Similarly, intestinal immune cell composition  
379 at peak inflammation (Figure S4C-E) and resolution (Figure S4-F-H) was comparable between the  
380 inflamed groups. Taken together, these data suggested that adipocyte autophagy loss exacerbates  
381 intestinal inflammation in a colitis model induced by intestinal epithelial damage but not in a model of  
382 tolerance breakdown in which IL-10 signalling is disrupted.

383

384 *Intestinal inflammation promotes autophagic and fatty acid metabolic transcriptional programs in*  
385 *primary adipocytes*

386 At this point, it remained unclear how the loss of adipocyte autophagy mediates the increase in intestinal  
387 inflammation during DSS-induced colitis. Previous studies identified that adipose tissues from inflamed  
388 animals shift their transcriptional profile and exhibit increased expression of genes involved in  
389 inflammatory pathways and cytokine production (Mustain et al., 2013). For example, adipocytes  
390 produce pro-inflammatory cytokines such as IL-6 and TNFα upon inflammation (Hotamisligil, 2017). We  
391 therefore hypothesized that autophagy may impact the transcriptional inflammatory profile of visceral  
392 adipocytes during intestinal inflammation, thus promoting inflammation. In order to analyse autophagy-  
393 dependent differences in adipocyte transcription profiles, visceral adipocytes were collected from mice  
394 treated with DSS or water and subsequently sequenced. Since we anticipated sex-specific differences  
395 in adipocyte transcription profiles (Oliva et al., 2020), we included the same number of male and female  
396 mice in each experimental group (Figure 4A). As expected, sex-specific transcriptional changes

397 explained ~33% of the dataset variance (Figure 4B), in line with previous reports. While the treatment  
398 clearly separated the experimental groups in the principal component analysis (PCA), there was no  
399 major impact of the genotype on the transcriptomic dataset (Figure 4B). Reassuringly, visceral  
400 adipocytes from *Atg7<sup>Ad</sup>* mice had a strong reduction in *Atg7* levels and an increase in estrogen receptor  
401 1 (*Esr1*) expression, due to the Cre transgene expression (Figure S5A-B), when compared by  
402 differential gene expression analysis. In line with the PCA analysis, across the treatment groups only  
403 17 genes were significantly upregulated and 15 genes were downregulated in *Atg7*-deficient visceral  
404 adipocytes compared to wild-type (Figure S5A-B). The limited effect of autophagy loss has previously  
405 been observed in other contexts (Cadwell et al., 2008). Importantly, this data suggests that the loss of  
406 adipocyte autophagy does not alter the transcriptional regulation of inflammatory pathways in the  
407 adipocytes themselves, neither during homeostasis nor DSS treatment.

408 Having confirmed that autophagy loss does not substantially affect the transcriptional profile of  
409 adipocytes in either homeostasis or DSS-induced colitis, we next compared non-inflamed to inflamed  
410 adipocytes from wild-type animals. More than 4700 genes were differentially regulated between these  
411 states (Figure S5C), among which 2415 were significantly upregulated and 2333 downregulated. Gene  
412 ontology analysis using *clusterProfiler* further revealed an enrichment in several gene sets (Figure 4C).  
413 Confirming our earlier results that adipocyte autophagy is affected by DSS-induced colitis (Figure 1G),  
414 intestinal inflammation led to an enrichment of genes involved in macroautophagy in visceral adipocytes  
415 (Figure 4D), in particular by an increased expression of several *Atg8* homologues (*Gabarap*, *Gabarapl1*,  
416 *Map1lc3a*, *Map1lc3b*) (Figure S5D). In addition, genes related to fatty acid metabolism were enriched  
417 in visceral adipocytes during intestinal inflammation (Figure 4E). Interestingly, genes encoding for key  
418 proteins involved in the lipolytic pathway such *Adrb3*, *Pnpla2*, *Lipe* and *Fabp4* were upregulated upon  
419 intestinal inflammation (Figure 4F), implicating a change in the lipolytic status of the adipocytes. The  
420 increase of lipolytic genes (*Lipe*, *Pnpla2*) and simultaneous decrease of lipogenic genes (*Dgat2*, *Lpl*) is  
421 similarly observed in cachexic conditions (Baazim et al., 2021). Overall, intestinal inflammation leads to  
422 a broad transcriptional response in visceral adipocytes, altering autophagy and fatty acid metabolism,  
423 among others. However, disruption of autophagy had only limited effects on the visceral adipocyte  
424 transcriptome, suggesting that autophagy may affect adipocytes on a post-transcriptional level.

425



426 *Autophagy-deficient adipocytes differentially secrete fatty acids in response to TNF $\alpha$*

427 Our transcriptomic analysis suggested enhanced autophagic and lipolytic pathways in adipocytes upon  
428 colitis. Recent reports implicated autophagy in mature adipocytes in the secretion of FFA in response  
429 to  $\beta$ -adrenergic receptor-mediated lipolysis (Cai et al., 2018; Son et al., 2020). To confirm the  
430 importance of adipocyte autophagy for optimal lipolytic output, supernatant FFA levels were measured  
431 upon exposure of autophagy-deficient and –sufficient adipocyte tissues to isoproterenol. Strikingly, FFA  
432 secretion was reduced upon lipolysis stimulation in autophagy-deficient adipocytes (Figure S6A). TNF $\alpha$ ,  
433 a crucial cytokine for human and murine IBD pathologies (Friedrich et al., 2019), can affect adipose  
434 tissue through inhibition of lipogenesis and by promoting FFA secretion (Cawthorn and Sethi, 2008).  
435 Furthermore, TNF $\alpha$  has also been implicated as a necessary component to elicit anti-inflammatory  
436 pathways during intestinal inflammation (Kojouharoff et al., 1997; Noti et al., 2010). Since we found  
437 transcriptional changes in both fatty acid metabolism and TNF $\alpha$  regulatory pathways in inflamed  
438 adipocytes (Figure 4C), we further investigated the effects of TNF $\alpha$  on adipocyte lipid metabolism in  
439 this context. Expression of the gene encoding for TNF receptor 1, *Tnfrsf1a*, was upregulated during  
440 DSS-induced inflammation in both genotypes, suggesting that TNF $\alpha$ -sensing was unaffected by the  
441 loss of adipocyte autophagy (Figure 5A). As expected, DSS-induced colitis leads to an up-regulation of  
442 circulating levels of TNF $\alpha$  (Figure 5B). Furthermore, TNF $\alpha$  is a potent inducer of adipocyte lipolysis  
443 (Green et al., 1994; Ryden et al., 2002), therefore we used adipose tissue explants from *Atg7<sup>Ad</sup>* mice  
444 or littermate controls and stimulated them with recombinant TNF $\alpha$ . In the presence of TNF $\alpha$ , adipocytes  
445 turn on FFA secretion, however strikingly, autophagy-deficient adipocytes showed a significant  
446 reduction in FFA secretion upon TNF $\alpha$  stimulation (Figure 5C). Consistent with the decreased lipolytic  
447 activity of autophagy-deficient adipocytes, *Atg7<sup>Ad</sup>* mice exhibit reduced serum FFA levels compared to  
448 wild-type littermates upon DSS colitis (Figure 5D). While autophagy is well-known to be a potential  
449 source of FFA, it remains unclear whether autophagy can affect specific FFA species more than others.  
450 To investigate this, serum samples from water and DSS-treated animals were analysed by GC-FID.  
451 Interestingly, the proportion of individual serum FFAs was unaffected by the loss of adipocyte  
452 autophagy (Figure 5E). However, confirming our initial findings, the serum concentration of several FFA  
453 species was reduced upon adipocyte autophagy loss, indicating that adipocyte autophagy controls  
454 overall FFA levels rather than specific FFAs (Figure 5F). The expression of cytosolic lipases in visceral

455 adipocytes remained comparable between DSS-treated wild-type and *Atg7<sup>Ad</sup>* mice, suggesting that  
456 autophagy regulates FFA secretion on a post-transcriptional level (Figure S6B).

457 In addition to controlling circulating FFA levels, adipocytes take part in the control of other serum lipid  
458 species. Therefore, using an unbiased approach, the serum lipidome of *Atg7<sup>Ad</sup>* and wild-type littermate  
459 controls was assessed upon DSS-induced colitis. Principal component analysis revealed no distinctive  
460 groups based on the genotype and no differentially abundant lipids were detected upon DSS-induced  
461 colitis (Figure S6C-D). However, the serum lipidome shifted upon DSS-induced colitis, reflecting the  
462 state of inflammation (Figure S6E). Overall, our data suggests that adipocyte autophagy controls the  
463 release of FFA upon TNF $\alpha$  stimulation and that its loss reduces systemic FFA levels *in vivo*.

464 Next, we wanted to address whether the reduction in FFA availability affects their uptake by immune  
465 cells in the adipose tissue or at the site of inflammation. Medium and long chain fatty acids are taken  
466 up through the fatty acid transporter CD36, which is expressed on multiple cell types, including immune  
467 cells. Thus, we assessed the expression of CD36 *in vivo* to identify immune cell subsets that acquire  
468 FFA in their tissue environment upon DSS-induced colitis. In the colon, CD36 expression on  
469 lymphocytes and monocytes was reduced upon DSS colitis, whereas its expression on dendritic cells  
470 and macrophages remained unchanged (Figure S6F). Interestingly, ATMs increased their expression  
471 of CD36 upon DSS-induced colitis, which was blunted on ATMs isolated from DSS-treated *Atg7<sup>Ad</sup>* mice  
472 in mesenteric and visceral adipose tissues (Figure 5G). This is in line with previous reports  
473 demonstrating that CD36 is upregulated on ATMs upon increased adipose tissue lipolysis in mice  
474 submitted to caloric restriction (Kosteli et al., 2010). Taken together, our data implicates adipocyte  
475 autophagy in the provision of FFA, both systemically and locally, resulting in altered FFA transporter  
476 expression by ATMs.

477

478 *Adipocyte autophagy controls IL-10 secretion from mesenteric and visceral adipose tissues upon DSS-*  
479 *induced colitis*

480 Fatty acid availability can have a significant functional impact on immune cells (Rosa Neto et al., 2021).  
481 Next, we tested whether the autophagy-dependent decrease in adipose tissue lipolysis resulted in  
482 differentially secreted cytokines from ATMs. To address this, we screened the serum using a pre-  
483 defined inflammatory cytokine panel. Strikingly, while IL-10 and IL-27 were significantly upregulated in

484 DSS-treated wild type mice, their expression was diminished in adipocyte autophagy-deficient mice  
485 (Figure 6A). The difference in IL-10 levels in the serum did not arise from the colon, since only *Il27*  
486 transcript levels, but not *Il10*, were increased in the lamina propria of *Atg7<sup>Ad</sup>* mice upon colitis induction  
487 (Figure 6B).

488 It has been previously described that adipose tissue immune cells can increase expression of IL-10  
489 upon intestinal inflammation (Kredel et al., 2013). Unbiased cytokine screening of secreted cytokines  
490 from wild-type mice revealed that several cytokines are released from the mesenteric adipose tissue in  
491 response to both DSS- and *Hh*-induced colitis (Figure S7A-D). Importantly, and validating previous  
492 reports, IL-10 secretion from the mesenteric adipose tissue was significantly up-regulated at peak  
493 inflammation of DSS-induced colitis (Figure 6C). We therefore tested whether IL-10 secretion from the  
494 mesenteric and gonadal adipose tissue was affected by adipocyte autophagy loss. Remarkably,  
495 disruption of adipocyte autophagy abolished DSS-induced IL-10 secretion from both mesenteric and  
496 gonadal adipose tissues, indicating that even adipose tissues that are not adjacent to the inflammation  
497 site contribute to the anti-inflammatory response (Figure 6D). This response was consistent with  
498 decreased systemic IL-10 levels in the serum (Figure 6A). Adipose tissue inflammation is associated  
499 with an increase in TNF $\alpha$  secretion during obesity, promoting metaflammation (Sethi and Hotamisligil,  
500 2021). However, loss of adipocyte autophagy did not lead to an increased secretion of TNF $\alpha$  from  
501 adipose tissues (Figure 6E), thus demonstrating that adipose tissue inflammation is not responsible for  
502 increased systemic TNF $\alpha$  levels. TNF $\alpha$  is most likely produced by the colon under the influence of  
503 reduced systemic IL-10. Taken together, adipose tissues augment cytokine secretion during intestinal  
504 inflammation, actively contributing to systemic cytokine production. Furthermore, our data suggest that  
505 adipocyte autophagy regulates IL-10 production from both mesenteric and visceral adipose tissues.

506

#### 507 *FFA restriction impairs IL-10 production in macrophages*

508 Next, to determine which cells are the main source of IL-10 in adipose tissues, immune cells were  
509 isolated and their cytokine production capacity was measured. We found that, upon DSS-induced  
510 colitis, F4/80<sup>+</sup> macrophages are the main producers of IL-10 in mesenteric and visceral adipose tissues,  
511 although CD4<sup>+</sup> T cells appear to contribute as well in mesenteric WAT (Figure 7A). To directly confirm  
512 whether local FFA availability can modify macrophage-derived IL-10 production, we sought to restrict

513 FFA availability from bone marrow derived macrophages. Charcoal treatment has previously been used  
514 to deplete FFAs from serum (Chen, 1967). First, we confirmed that FFA concentrations in medium  
515 containing charcoal-treated FBS ( $R_{\text{Charcoal}}$ ) or serum-free medium ( $R_0$ ) were reduced (Figure 7B).  
516 Culturing LPS and IFN $\gamma$  stimulated macrophages in FFA-depleted medium blunted CD36 upregulation  
517 (Figure 7C), which correlated with medium FFA concentration (Figure 7D). Importantly, limiting FFA  
518 availability led to an increased proportion of TNF $\alpha$ -producing macrophages after 16h hours, while IL-  
519 10 producing cells were drastically reduced (Figure 7E). This indicated that FFA restriction leads to a  
520 sustained pro-inflammatory macrophage phenotype. In line with this, supernatant concentrations of IL-  
521 10 were clearly reduced upon FFA restriction (Figure 7F), thus indicating that local FFA availability  
522 impairs the production of anti-inflammatory IL-10 from macrophages.

523

## 524 **Discussion**

525 Inflammation and activation of immune cells promote intracellular metabolic adaptation, which is  
526 important to govern pro- and anti-inflammatory pathways (O'Neill et al., 2016). However, immune cells  
527 reside within distinct tissue environments and the impact of local nutrient availability on inflammatory  
528 processes remains incompletely understood (Richter et al., 2018). In this study, we demonstrate that  
529 autophagy in adipocytes promotes a cell-extrinsic effect on the secretion of IL-10 by adipose-tissue  
530 resident ATMs. Our results further indicate that autophagy in mature adipocytes is crucial for optimal  
531 cellular release and availability of FFA during inflammation. Autophagy-dependent IL-10 secretion from  
532 adipose tissue contributes to systemic levels, and limits inflammation at a distant tissue site, the  
533 intestine. Therefore, our study provides novel insights into a cross-tissue anti-inflammatory mechanism,  
534 enabling the development of alternative therapeutic approaches to treat inflammatory diseases.

535

536 Autophagy genes are well established as genetic risk factors for IBD susceptibility. Yet, little is known  
537 about the role of adipocyte autophagy in this disease. We found that autophagy is increased in visceral  
538 adipocytes upon DSS-induced colitis and showed that adipocytes transcriptionally increased the  
539 expression of several *Atg8* homologues during peak inflammation. These observations parallel findings  
540 during muscle atrophy, where the expression of *Map1lc3b*, *Gabarapl1*, *Bnip3*, *Bnip3l* and *Vps34* is  
541 regulated via FOXO3 activation, which subsequently controls autophagy levels (Mammucari et al.,

542 2007). It appears plausible that a similar FOXO3-dependent cachexia occurs in adipocytes.  
543 Interestingly, *Foxo3*-deficient mice develop more severe DSS-induced colitis than wild-type littermates  
544 (Snoeks et al., 2009). The induced genetic ablation of *Atg7* in mature adipocytes did not induce  
545 spontaneous colitis, thus indicating that genetic alterations in adipocyte autophagy by itself does not  
546 cause intestinal inflammation. However, adipocyte autophagy loss upon intestinal tissue damage  
547 worsened disease severity, pointing towards a supporting role of adipocyte autophagy in controlling  
548 immune exacerbation. We conclude that the involvement of autophagy in this pathology may depend  
549 on intestinal-derived cues (such as TNF $\alpha$  or bacterial translocation) and on a threshold to promote  
550 systemic inflammation (Rivera et al., 2019).

551

552 Detailed analysis of the visceral adipose secretome revealed that it is a prominent source of cytokines  
553 during intestinal inflammation. This work expands previous observations describing an increase of pro-  
554 inflammatory cytokine gene expression in mesenteric adipose tissues upon DSS-induced colitis  
555 (Mustain et al., 2013). Of note, the transcriptome of visceral adipocytes did not reveal changes in  
556 inflammatory cytokine expression upon DSS-treatment, thus indicating that the expression of these  
557 cytokines is likely derived from adipose tissue-resident immune cells. In addition to inflammatory  
558 cytokines, the secretion of IL-10 was observed in visceral adipose tissues upon intestinal inflammation,  
559 confirming findings from the Siegmund lab that mesenteric ATMs upregulate expression of IL-10 during  
560 intestinal inflammation in both human and mouse (Batra et al., 2012; Kredel et al., 2013). Importantly,  
561 this study underscores the importance of adipose-tissue derived IL-10 in controlling disease severity.  
562 Interestingly, we were unable to find differences in the *Hh*-induced colitis model. This may be explained  
563 by the administration of the IL-10R blocking antibody which neutralizes the anti-inflammatory effects of  
564 adipose tissue-derived IL-10 in this model of colitis, especially since we noted that IL-10 is actively  
565 secreted from *Hh* and IL10R-adipose tissues, thus suggesting that a similar pathway may also be  
566 present in this model of colitis. Recent single cell transcriptomic analysis of immune cells resident in  
567 creeping fat tissues revealed an important anti-inflammatory and pro-repair role of ATMs, further  
568 supporting their beneficial role during intestinal inflammation (Ha et al., 2020). Intriguingly, their study  
569 also identified a significant upregulation of IL-10 in ATMs in creeping fat tissue, suggesting that the  
570 adipocyte-immune cell pathway identified here is relevant for human IBD.

571

572 Early studies found that autophagy is crucial for adipogenesis and the normal differentiation of adipose  
573 tissues *in vivo* (Singh et al., 2009; Zhang et al., 2009). However, the significance of autophagy in mature  
574 adipocytes remained unexplored until recently. We propose that autophagy in mature adipocytes fine-  
575 tunes lipolytic output of adipocytes upon metabolic and/or inflammatory stress conditions. Supporting  
576 this view, post-developmental ablation of autophagy in mature adipocytes decreased  $\beta$ -adrenergic  
577 receptor-induced lipolysis (Cai et al., 2018; Son et al., 2020). Conversely, disruption of mTOR by genetic  
578 deletion of Raptor increases lipolytic output via autophagy (Zhang et al., 2020). While we were unable  
579 to observe signs of lipophagy by electron microscopy, it is possible that adipocyte autophagy controls  
580 lipolytic output via the degradation of key proteins involved in the lipolytic machinery such as described  
581 for perilipins in fibroblasts and adipocytes (Ju et al., 2019; Kaushik and Cuervo, 2016).

582

583 Macrophages accumulate in creeping fat tissues of CD patients and in the mesentery of mice upon  
584 DSS-induced colitis (Batra et al., 2012). We show that local FFA availability can dictate functional  
585 macrophage responses, such as the secretion of IL-10. In line with this, M2-type macrophages require  
586 uptake of lipid substrates through CD36 to engage OXPHOS-dependent cell activation (Huang et al.,  
587 2014). Even in iNKT cells and Tregs, the production of IL-10 can be regulated through the availability  
588 of FFA in the adipose tissue (LaMarche et al., 2020; Pompura et al., 2021). The importance of lipid  
589 metabolism for M2 polarization and function has further been demonstrated by the macrophage-specific  
590 loss of PPAR $\gamma$  and PPAR $\delta$  (Odegaard et al., 2007; Odegaard et al., 2008). The resulting reduction in  
591 systemic IL-10 levels due to lipid restriction prolongs pro-inflammatory programs at the inflammation  
592 site. Especially, IL-10 signalling is required for intestinal macrophages to prevent excessive glycolytic  
593 and pro-inflammatory activity during DSS-induced colitis by inhibiting mTOR activity (Ip et al., 2017).

594

595 The importance of cell-extrinsic autophagy becomes increasingly apparent for intercellular and inter-  
596 tissue communication. While the exchange of nutrients, especially amino acids, has been  
597 predominantly characterized in the context of cancer (Poillet-Perez and White, 2019), it remained  
598 unclear whether it occurs in immunity. This report presents to our knowledge the first demonstration of  
599 an autophagy-dependent mobilization of lipids during inflammation. This is supported by an elegant

600 study suggesting that, during organ wasting, autophagy cell-extrinsically mobilizes stored nutrients to  
601 cancer cells to sustain their growth (Khezri et al., 2021). Despite its central function in bulk degradation  
602 and nutrient recycling, parts of the autophagic machinery have been implicated in other cell-extrinsic  
603 processes such as secretory autophagy and the release of extracellular vesicles (Kuramoto et al., 2021;  
604 Leidal et al., 2020; Nicolas-Avila et al., 2020). While we found that regulation of autophagy-dependent  
605 FFA levels can control IL-10 production in macrophages, we cannot exclude that other cell-extrinsic  
606 processes of autophagy may contribute to the observed phenotype.

607

608 Overall, this study reveals that metabolically healthy adipose tissues are important regulators of  
609 excessive inflammation during colitis. While visceral adipose tissues can adapt both pro- and anti-  
610 inflammatory properties, its impact on the pathology may depend on the overall disease state, genetic  
611 predispositions and co-morbidities. In this context, the expansion of the mesentery during CD may  
612 initially be beneficial through prevention of bacterial translocation and signalling pathways poised to  
613 promote anti-inflammatory and pro-fibrotic pathways (Batra et al., 2012; Ha et al., 2020). However,  
614 sustained inflammation may ultimately subvert the function of the mesentery and ultimately lead to  
615 adipose tissue fibrosis and intestinal strictures (Mao et al., 2019). Here, we demonstrate that adipocyte  
616 autophagy contributes cell-extrinsically to the provision of FFA and thus controls the anti-inflammatory  
617 immune response to intestinal tissue injury (see Graphical Abstract). It underlines the importance of  
618 local adipocyte-immune cell crosstalk through regulation of nutrient availability. This may present a  
619 broader local metabolic regulatory pathway to control immune responses to inflammation and infection.

### **Acknowledgements**

We thank Patricia Cotta Moreira, Daniel Andrew and Mino Medghalchi from the Kennedy Institute animal facility for their excellent care and assistance of animal well-being. Dr. Nicholas Illot, Alina Janney and Dr. Luca Baù for their help with R coding. Discussions about experimental design for the transcriptomic experiments and sequencing were performed with help of Prof. Stephen Samson, Dr. Moustafa Attar and the Oxford Genomics Centre. Histology was performed with the help from the Kennedy Institute Histology Facility, especially Dr. Ida Parisi. This work was supported by grants from the Wellcome Trust (Investigator award 103830/Z/14/Z and 220784/Z/20/Z to A.K.S., Investigator award 212240/Z/18/Z to F.P., PhD studentship award 203803/Z/16/Z to F.C.R., PhD studentship award 108869/Z/15/Z to S.K.W.), the Kenneth Rainin Foundation (Innovator award 20210017 to A.K.S. and F.P., jointly), the Kennedy Trust Studentship (KEN192001 to K.P.), the Marie Skłodowska-Curie - European Fellowship (893676 to M.B.) Blood Cancer UK (15026 and 17012 to C.M.E). Li-cor Odyssey imager was funded by ERC AdG 670930.

### **Authors Contribution**

Conceptualization, F.C.R, M.F and K.A.S.; Methodology, F.C.R, M.F., I.G., E.J.; Formal Analysis, F.C.R. and M.F.; Investigation, F.C.R., M.F., M.P., G.A., I.G., S.K.W., E.J., M.B., K.P., P.H.; Writing – Original Draft, F.C.R., A.K.S; Writing – Review and Editing, M.F., M.P., G.A., I.G., S.K.W., E.J., M.B., K.P., P.H., H.S.S., C.M.E., A.K.S.; Visualization, F.C.R, Supervision, M.F., H.S.S., C.M.E, F.P., A.K.S.; Funding Acquisition, F.C.R., F.P., A.K.S.

### **Declaration of Interests**

F.P. received research support or consultancy fees from Roche, Janssen, GSK, Novartis and Genentech. A,K.S. received consultancy fees from Calico, Oxford Healthspan, The Longevity Lab.



## **References**

- An, Y.A., and Scherer, P.E. (2020). Mouse Adipose Tissue Protein Extraction. *Bio Protoc* *10*, e3631.
- Baazim, H., Antonio-Herrera, L., and Bergthaler, A. (2021). The interplay of immunology and cachexia in infection and cancer. *Nat Rev Immunol*.
- Batra, A., Heimesaat, M.M., Bereswill, S., Fischer, A., Glauben, R., Kunkel, D., Scheffold, A., Erben, U., Kuhl, A., Loddenkemper, C., *et al.* (2012). Mesenteric fat - control site for bacterial translocation in colitis? *Mucosal Immunol* *5*, 580-591.
- Bray, N.L., Pimentel, H., Melsted, P., and Pachter, L. (2016). Near-optimal probabilistic RNA-seq quantification. *Nat Biotechnol* *34*, 525-527.
- Cadwell, K., Liu, J.Y., Brown, S.L., Miyoshi, H., Loh, J., Lennerz, J.K., Kishi, C., Kc, W., Carrero, J.A., Hunt, S., *et al.* (2008). A key role for autophagy and the autophagy gene Atg16l1 in mouse and human intestinal Paneth cells. *Nature* *456*, 259-263.
- Cadwell, K., Patel, K.K., Komatsu, M., Virgin, H.W.t., and Stappenbeck, T.S. (2009). A common role for Atg16L1, Atg5 and Atg7 in small intestinal Paneth cells and Crohn disease. *Autophagy* *5*, 250-252.
- Cai, J., Pires, K.M., Ferhat, M., Chaurasia, B., Buffolo, M.A., Smalling, R., Sargsyan, A., Atkinson, D.L., Summers, S.A., Graham, T.E., *et al.* (2018). Autophagy Ablation in Adipocytes Induces Insulin Resistance and Reveals Roles for Lipid Peroxide and Nrf2 Signaling in Adipose-Liver Crosstalk. *Cell Rep* *25*, 1708-1717 e1705.
- Cawthorn, W.P., and Sethi, J.K. (2008). TNF-alpha and adipocyte biology. *FEBS Lett* *582*, 117-131.
- Chen, R.F. (1967). Removal of fatty acids from serum albumin by charcoal treatment. *J Biol Chem* *242*, 173-181.
- Clarke, A.J., and Simon, A.K. (2019). Autophagy in the renewal, differentiation and homeostasis of immune cells. *Nat Rev Immunol* *19*, 170-183.
- Collins, K.H., Lenz, K.L., Pollitt, E.N., Ferguson, D., Hutson, I., Springer, L.E., Oestreich, A.K., Tang, R., Choi, Y.R., Meyer, G.A., *et al.* (2021). Adipose tissue is a critical regulator of osteoarthritis. *Proc Natl Acad Sci U S A* *118*.
- Danne, C., Ryzhakov, G., Martinez-Lopez, M., Ilott, N.E., Franchini, F., Cuskin, F., Lowe, E.C., Bullers, S.J., Arthur, J.S.C., and Powrie, F. (2017). A Large Polysaccharide Produced by *Helicobacter hepaticus* Induces an Anti-inflammatory Gene Signature in Macrophages. *Cell Host Microbe* *22*, 733-745 e735.
- Dieleman, L.A., Palmen, M.J., Akol, H., Bloemena, E., Pena, A.S., Meuwissen, S.G., and Van Rees, E.P. (1998). Chronic experimental colitis induced by dextran sulphate sodium (DSS) is characterized by Th1 and Th2 cytokines. *Clin Exp Immunol* *114*, 385-391.
- Fischer, F.A., Mies, L.F.M., Nizami, S., Pantazi, E., Danielli, S., Demarco, B., Ohlmeyer, M., Lee, M.S.J., Coban, C., Kagan, J.C., *et al.* (2021). TBK1 and IKKepsilon act like an OFF switch to limit NLRP3 inflammasome pathway activation. *Proc Natl Acad Sci U S A* *118*.
- Folch, J., Lees, M., and Sloane Stanley, G.H. (1957). A simple method for the isolation and purification of total lipides from animal tissues. *J Biol Chem* *226*, 497-509.
- Friedrich, M., Pohin, M., and Powrie, F. (2019). Cytokine Networks in the Pathophysiology of Inflammatory Bowel Disease. *Immunity* *50*, 992-1006.
- Grant, R.W., and Dixit, V.D. (2015). Adipose tissue as an immunological organ. *Obesity (Silver Spring)* *23*, 512-518.

Green, A., Dobias, S.B., Walters, D.J., and Brasier, A.R. (1994). Tumor necrosis factor increases the rate of lipolysis in primary cultures of adipocytes without altering levels of hormone-sensitive lipase. *Endocrinology* *134*, 2581-2588.

Guiboileau, A., Avila-Ospina, L., Yoshimoto, K., Soulay, F., Azzopardi, M., Marmagne, A., Lothier, J., and Masclaux-Daubresse, C. (2013). Physiological and metabolic consequences of autophagy deficiency for the management of nitrogen and protein resources in Arabidopsis leaves depending on nitrate availability. *New Phytol* *199*, 683-694.

Guiboileau, A., Yoshimoto, K., Soulay, F., Bataille, M.P., Avice, J.C., and Masclaux-Daubresse, C. (2012). Autophagy machinery controls nitrogen remobilization at the whole-plant level under both limiting and ample nitrate conditions in Arabidopsis. *New Phytol* *194*, 732-740.

Ha, C.W.Y., Martin, A., Sepich-Poore, G.D., Shi, B., Wang, Y., Gouin, K., Humphrey, G., Sanders, K., Ratnayake, Y., Chan, K.S.L., *et al.* (2020). Translocation of Viable Gut Microbiota to Mesenteric Adipose Drives Formation of Creeping Fat in Humans. *Cell* *183*, 666-683 e617.

Hampe, J., Franke, A., Rosenstiel, P., Till, A., Teuber, M., Huse, K., Albrecht, M., Mayr, G., De La Vega, F.M., Briggs, J., *et al.* (2007). A genome-wide association scan of nonsynonymous SNPs identifies a susceptibility variant for Crohn disease in ATG16L1. *Nat Genet* *39*, 207-211.

Ho, Y.T., Shimbo, T., Wijaya, E., Kitayama, T., Takaki, S., Ikegami, K., Miyashita, K., Ouchi, Y., Takaki, E., Yamamoto, R., *et al.* (2021). Longitudinal Single-Cell Transcriptomics Reveals a Role for Serpina3n-Mediated Resolution of Inflammation in a Mouse Colitis Model. *Cell Mol Gastroenterol Hepatol* *12*, 547-566.

Hotamisligil, G.S. (2017). Inflammation, metaflammation and immunometabolic disorders. *Nature* *542*, 177-185.

Huang, S.C., Everts, B., Ivanova, Y., O'Sullivan, D., Nascimento, M., Smith, A.M., Beatty, W., Love-Gregory, L., Lam, W.Y., O'Neill, C.M., *et al.* (2014). Cell-intrinsic lysosomal lipolysis is essential for alternative activation of macrophages. *Nat Immunol* *15*, 846-855.

Ip, W.K.E., Hoshi, N., Shouval, D.S., Snapper, S., and Medzhitov, R. (2017). Anti-inflammatory effect of IL-10 mediated by metabolic reprogramming of macrophages. *Science* *356*, 513-519.

Jostins, L., Ripke, S., Weersma, R.K., Duerr, R.H., McGovern, D.P., Hui, K.Y., Lee, J.C., Schumm, L.P., Sharma, Y., Anderson, C.A., *et al.* (2012). Host-microbe interactions have shaped the genetic architecture of inflammatory bowel disease. *Nature* *491*, 119-124.

Ju, L., Han, J., Zhang, X., Deng, Y., Yan, H., Wang, C., Li, X., Chen, S., Alimujiang, M., Li, X., *et al.* (2019). Obesity-associated inflammation triggers an autophagy-lysosomal response in adipocytes and causes degradation of perilipin 1. *Cell Death Dis* *10*, 121.

Kabat, A.M., Harrison, O.J., Riffelmacher, T., Moghaddam, A.E., Pearson, C.F., Laing, A., Abeler-Dorner, L., Forman, S.P., Grecis, R.K., Sattentau, Q., *et al.* (2016). The autophagy gene Atg16l1 differentially regulates Treg and TH2 cells to control intestinal inflammation. *Elife* *5*, e12444.

Kang, Y.H., Cho, M.H., Kim, J.Y., Kwon, M.S., Peak, J.J., Kang, S.W., Yoon, S.Y., and Song, Y. (2016). Impaired macrophage autophagy induces systemic insulin resistance in obesity. *Oncotarget* *7*, 35577-35591.

Katheder, N.S., Khezri, R., O'Farrell, F., Schultz, S.W., Jain, A., Rahman, M.M., Schink, K.O., Theodossiou, T.A., Johansen, T., Juhasz, G., *et al.* (2017). Microenvironmental autophagy promotes tumour growth. *Nature* *541*, 417-420.

Kaushik, S., and Cuervo, A.M. (2016). AMPK-dependent phosphorylation of lipid droplet protein PLIN2 triggers its degradation by CMA. *Autophagy* *12*, 432-438.

Khezri, R., Holland, P., Schoborg, T.A., Abramovich, I., Takats, S., Dillard, C., Jain, A., O'Farrell, F., Schultz, S.W., Hagopian, W.M., *et al.* (2021). Host autophagy mediates organ wasting and nutrient mobilization for tumor growth. *EMBO J* 40, e107336.

Kojouharoff, G., Hans, W., Obermeier, F., Mannel, D.N., Andus, T., Scholmerich, J., Gross, V., and Falk, W. (1997). Neutralization of tumour necrosis factor (TNF) but not of IL-1 reduces inflammation in chronic dextran sulphate sodium-induced colitis in mice. *Clin Exp Immunol* 107, 353-358.

Komatsu, M., Waguri, S., Ueno, T., Iwata, J., Murata, S., Tanida, I., Ezaki, J., Mizushima, N., Ohsumi, Y., Uchiyama, Y., *et al.* (2005). Impairment of starvation-induced and constitutive autophagy in Atg7-deficient mice. *J Cell Biol* 169, 425-434.

Kosteli, A., Sugaru, E., Haemmerle, G., Martin, J.F., Lei, J., Zechner, R., and Ferrante, A.W., Jr. (2010). Weight loss and lipolysis promote a dynamic immune response in murine adipose tissue. *J Clin Invest* 120, 3466-3479.

Kredel, L.I., Batra, A., Stroh, T., Kuhl, A.A., Zeitz, M., Erben, U., and Siegmund, B. (2013). Adipokines from local fat cells shape the macrophage compartment of the creeping fat in Crohn's disease. *Gut* 62, 852-862.

Kuramoto, K., Kim, Y.J., Hong, J.H., and He, C. (2021). The autophagy protein Becn1 improves insulin sensitivity by promoting adiponectin secretion via exocyst binding. *Cell Rep* 35, 109184.

LaMarche, N.M., Kane, H., Kohlgruber, A.C., Dong, H., Lynch, L., and Brenner, M.B. (2020). Distinct iNKT Cell Populations Use IFN $\gamma$  or ER Stress-Induced IL-10 to Control Adipose Tissue Homeostasis. *Cell Metab* 32, 243-258 e246.

Leidal, A.M., Huang, H.H., Marsh, T., Solvik, T., Zhang, D., Ye, J., Kai, F., Goldsmith, J., Liu, J.Y., Huang, Y.H., *et al.* (2020). The LC3-conjugation machinery specifies the loading of RNA-binding proteins into extracellular vesicles. *Nat Cell Biol* 22, 187-199.

Love, M.I., Huber, W., and Anders, S. (2014). Moderated estimation of fold change and dispersion for RNA-seq data with DESeq2. *Genome Biol* 15, 550.

Mammucari, C., Milan, G., Romanello, V., Masiero, E., Rudolf, R., Del Piccolo, P., Burden, S.J., Di Lisi, R., Sandri, C., Zhao, J., *et al.* (2007). FoxO3 controls autophagy in skeletal muscle in vivo. *Cell Metab* 6, 458-471.

Mao, R., Kurada, S., Gordon, I.O., Baker, M.E., Gandhi, N., McDonald, C., Coffey, J.C., and Rieder, F. (2019). The Mesenteric Fat and Intestinal Muscle Interface: Creeping Fat Influencing Stricture Formation in Crohn's Disease. *Inflamm Bowel Dis* 25, 421-426.

McCarroll, S.A., Huett, A., Kuballa, P., Chilewski, S.D., Landry, A., Goyette, P., Zody, M.C., Hall, J.L., Brant, S.R., Cho, J.H., *et al.* (2008). Deletion polymorphism upstream of IRGM associated with altered IRGM expression and Crohn's disease. *Nat Genet* 40, 1107-1112.

Mustain, W.C., Starr, M.E., Valentino, J.D., Cohen, D.A., Okamura, D., Wang, C., Evers, B.M., and Saito, H. (2013). Inflammatory cytokine gene expression in mesenteric adipose tissue during acute experimental colitis. *PLoS One* 8, e83693.

Nicolas-Avila, J.A., Lechuga-Vieco, A.V., Esteban-Martinez, L., Sanchez-Diaz, M., Diaz-Garcia, E., Santiago, D.J., Rubio-Ponce, A., Li, J.L., Balachander, A., Quintana, J.A., *et al.* (2020). A Network of Macrophages Supports Mitochondrial Homeostasis in the Heart. *Cell* 183, 94-109 e123.

Noti, M., Corazza, N., Mueller, C., Berger, B., and Brunner, T. (2010). TNF suppresses acute intestinal inflammation by inducing local glucocorticoid synthesis. *J Exp Med* 207, 1057-1066.

O'Neill, L.A., Kishton, R.J., and Rathmell, J. (2016). A guide to immunometabolism for immunologists. *Nat Rev Immunol* 16, 553-565.

Odegaard, J.I., Ricardo-Gonzalez, R.R., Goforth, M.H., Morel, C.R., Subramanian, V., Mukundan, L., Red Eagle, A., Vats, D., Brombacher, F., Ferrante, A.W., *et al.* (2007). Macrophage-specific PPARgamma controls alternative activation and improves insulin resistance. *Nature* 447, 1116-1120.

Odegaard, J.I., Ricardo-Gonzalez, R.R., Red Eagle, A., Vats, D., Morel, C.R., Goforth, M.H., Subramanian, V., Mukundan, L., Ferrante, A.W., and Chawla, A. (2008). Alternative M2 activation of Kupffer cells by PPARdelta ameliorates obesity-induced insulin resistance. *Cell Metab* 7, 496-507.

Oliva, M., Munoz-Aguirre, M., Kim-Hellmuth, S., Wucher, V., Gewirtz, A.D.H., Cotter, D.J., Parsana, P., Kasela, S., Balliu, B., Vinuela, A., *et al.* (2020). The impact of sex on gene expression across human tissues. *Science* 369.

Poillet-Perez, L., and White, E. (2019). Role of tumor and host autophagy in cancer metabolism. *Genes Dev* 33, 610-619.

Poillet-Perez, L., Xie, X., Zhan, L., Yang, Y., Sharp, D.W., Hu, Z.S., Su, X., Maganti, A., Jiang, C., Lu, W., *et al.* (2018). Autophagy maintains tumour growth through circulating arginine. *Nature* 563, 569-573.

Pompura, S.L., Wagner, A., Kitz, A., LaPerche, J., Yosef, N., Dominguez-Villar, M., and Hafler, D.A. (2021). Oleic acid restores suppressive defects in tissue-resident FOXP3 Tregs from patients with multiple sclerosis. *J Clin Invest* 131.

Richter, F.C., Obba, S., and Simon, A.K. (2018). Local exchange of metabolites shapes immunity. *Immunology* 155, 309-319.

Riffelmacher, T., Clarke, A., Richter, F.C., Stranks, A., Pandey, S., Danielli, S., Hublitz, P., Yu, Z., Johnson, E., Schwerd, T., *et al.* (2017). Autophagy-Dependent Generation of Free Fatty Acids Is Critical for Normal Neutrophil Differentiation. *Immunity* 47, 466-480 e465.

Riffelmacher, T., Richter, F.C., and Simon, A.K. (2018). Autophagy dictates metabolism and differentiation of inflammatory immune cells. *Autophagy* 14, 199-206.

Rivera, E.D., Coffey, J.C., Walsh, D., and Ehrenpreis, E.D. (2019). The Mesentery, Systemic Inflammation, and Crohn's Disease. *Inflamm Bowel Dis* 25, 226-234.

Rosa Neto, J.C., Calder, P.C., Curi, R., Newsholme, P., Sethi, J.K., and Silveira, L.S. (2021). The Immunometabolic Roles of Various Fatty Acids in Macrophages and Lymphocytes. *Int J Mol Sci* 22.

Russo, L., and Lumeng, C.N. (2018). Properties and functions of adipose tissue macrophages in obesity. *Immunology* 155, 407-417.

Ryden, M., Dicker, A., van Harmelen, V., Hauner, H., Brunnberg, M., Perbeck, L., Lonqvist, F., and Arner, P. (2002). Mapping of early signaling events in tumor necrosis factor-alpha -mediated lipolysis in human fat cells. *J Biol Chem* 277, 1085-1091.

Sassmann, A., Offermanns, S., and Wettschureck, N. (2010). Tamoxifen-inducible Cre-mediated recombination in adipocytes. *Genesis* 48, 618-625.

Sethi, J.K., and Hotamisligil, G.S. (2021). Metabolic Messengers: tumour necrosis factor. *Nat Metab* 3, 1302-1312.

Sheehan, A.L., Warren, B.F., Gear, M.W., and Shepherd, N.A. (1992). Fat-wrapping in Crohn's disease: pathological basis and relevance to surgical practice. *Br J Surg* 79, 955-958.

Singh, R., Xiang, Y., Wang, Y., Baikati, K., Cuervo, A.M., Luu, Y.K., Tang, Y., Pessin, J.E., Schwartz, G.J., and Czaja, M.J. (2009). Autophagy regulates adipose mass and differentiation in mice. *J Clin Invest* *119*, 3329-3339.

Snoeks, L., Weber, C.R., Wasland, K., Turner, J.R., Vainder, C., Qi, W., and Savkovic, S.D. (2009). Tumor suppressor FOXO3 participates in the regulation of intestinal inflammation. *Lab Invest* *89*, 1053-1062.

Son, Y., Cho, Y.K., Saha, A., Kwon, H.J., Park, J.H., Kim, M., Jung, Y.S., Kim, S.N., Choi, C., Seong, J.K., *et al.* (2020). Adipocyte-specific Beclin1 deletion impairs lipolysis and mitochondrial integrity in adipose tissue. *Mol Metab* *39*, 101005.

Sousa, C.M., Biancur, D.E., Wang, X., Halbrook, C.J., Sherman, M.H., Zhang, L., Kremer, D., Hwang, R.F., Witkiewicz, A.K., Ying, H., *et al.* (2016). Pancreatic stellate cells support tumour metabolism through autophagic alanine secretion. *Nature* *536*, 479-483.

Stranks, A.J., Hansen, A.L., Panse, I., Mortensen, M., Ferguson, D.J., Puleston, D.J., Shenderov, K., Watson, A.S., Veldhoen, M., Phadwal, K., *et al.* (2015). Autophagy Controls Acquisition of Aging Features in Macrophages. *J Innate Immun* *7*, 375-391.

Surma, M.A., Herzog, R., Vasilij, A., Klose, C., Christinat, N., Morin-Rivron, D., Simons, K., Masoodi, M., and Sampaio, J.L. (2015). An automated shotgun lipidomics platform for high throughput, comprehensive, and quantitative analysis of blood plasma intact lipids. *Eur J Lipid Sci Technol* *117*, 1540-1549.

Wang, L., Ray, A., Jiang, X., Wang, J.Y., Basu, S., Liu, X., Qian, T., He, R., Dittel, B.N., and Chu, Y. (2015). T regulatory cells and B cells cooperate to form a regulatory loop that maintains gut homeostasis and suppresses dextran sulfate sodium-induced colitis. *Mucosal Immunol* *8*, 1297-1312.

Whibley, N., Tucci, A., and Powrie, F. (2019). Regulatory T cell adaptation in the intestine and skin. *Nat Immunol* *20*, 386-396.

Wu, T., Hu, E., Xu, S., Chen, M., Guo, P., Dai, Z., Feng, T., Zhou, L., Tang, W., Zhan, L., *et al.* (2021). clusterProfiler 4.0: A universal enrichment tool for interpreting omics data. *Innovation (N Y)* *2*, 100141.

Zhang, H., Alsaleh, G., Feltham, J., Sun, Y., Napolitano, G., Riffelmacher, T., Charles, P., Frau, L., Hublitz, P., Yu, Z., *et al.* (2019). Polyamines Control eIF5A Hypusination, TFEB Translation, and Autophagy to Reverse B Cell Senescence. *Mol Cell* *76*, 110-125 e119.

Zhang, X., Wu, D., Wang, C., Luo, Y., Ding, X., Yang, X., Silva, F., Arenas, S., Weaver, J.M., Mandell, M., *et al.* (2020). Sustained activation of autophagy suppresses adipocyte maturation via a lipolysis-dependent mechanism. *Autophagy* *16*, 1668-1682.

Zhang, Y., Goldman, S., Baerga, R., Zhao, Y., Komatsu, M., and Jin, S. (2009). Adipose-specific deletion of autophagy-related gene 7 (atg7) in mice reveals a role in adipogenesis. *Proc Natl Acad Sci U S A* *106*, 19860-19865.

**Figure 1: DSS-induced intestinal inflammation promotes autophagy in adipose tissues.**

(A) Schematic of experimental design. Sex-matched and age-matched wild-type mice were treated for 5 days with 1.5-2% DSS in drinking water, before switched to water for two more days. Mice were sacrificed at day 7 post-DSS induction.

(B) Body weight development upon DSS treatment; n = 10-11/group, pooled from three independent experiments.

(C) Tissue weights measured in mesenteric (mWAT) and collective visceral white adipose tissue (visWAT), consisting of gonadal (gWAT), retroperitoneal and omental white adipose tissue at day 7 after start of DSS regime; n = 7-8/group pooled from two independent experiments.

(D) Circulating serum levels of FFA during DSS-induced colitis at day 7; n = 15/group pooled from four independent experiments.

(E) Immunoblot analysis of autophagic flux in mWAT (upper panel) and gWAT (lower panel) adipose tissue stimulated *ex vivo* with lysosomal inhibitor 100nM Bafilomycin A1 and 20mM NH<sub>4</sub>Cl for 4 hours or DMSO (Vehicle); n = 3-4/group pooled from two independent experiments.

(F) Representative transmission electron microscopy images from mesenteric adipose tissue 7 days post DSS-induced colitis induction. Lower panel is showing magnification of selected area. White arrows show autophagosomal structures.

(G) ATG8 homologues expression was measured by qPCR in visceral adipocytes fraction (right) and stromal vascular fraction (left panel) during DSS-induced colitis.; n = 7-8/group pooled from two independent experiment.

Data are represented as mean ± SEM. (B,G) Two-Way ANOVA. (C) Multiple unpaired t-test. (D,E) Unpaired Student's t-test.

**Figure 2: Loss of adipocyte autophagy does neither alter systemic nor intestinal immune homeostasis.**

(A) Schematic of experimental design. Sex-matched and age-matched littermates were treated at 8-12 weeks of age with tamoxifen for five consecutive days before tissues were analysed 14 days after the last tamoxifen administration.

(B) Representative quantification of knock-out efficiency measured on *Atg7* transcript level by qRT-PCR in purified primary visceral adipocyte at two weeks post-tamoxifen treatment (n = 4-11/group).

(C) Representative immunoblot for ATG7 and LC3-I/II protein expression and quantification of LC3 conversion ratio (LC3-II/LC3-I) (n = 3-10/group).

(D) Colon length after two weeks post-deletion; n = 14 pooled from two independent experiments.

(E) Representative H&E staining images (10x magnification) of colon sections and quantification; n = 9 from one independent experiment.

(F) Percentage (left panel) and absolute number of CD45<sup>+</sup> immune cells (right panel) from colons after two weeks post-deletion; n = 13-14 pooled from two independent experiments.

(G) Frequency of myeloid cell populations (left panel) and lymphoid populations (right panel) from colons after two weeks post-deletion; n = 13-14 pooled from two independent experiments.

(H) Frequency of CD4<sup>+</sup> T cell subpopulations from colons after two weeks post-deletion; n = 13-14 pooled from two independent experiments.

Data are represented as mean ± SEM. (B,C,G,H) Two-Way ANOVA. (D,E,F) Unpaired Student's t-test.

**Figure 3: Loss of adipocyte autophagy exacerbates DSS-induced colitis.**

(A) Schematic of experimental design. Sex-matched and age-matched littermates were treated at 8-12 weeks of age with tamoxifen for five consecutive days and DSS-induced colitis was induced after a two-week washout phase.

(B) Body weight development upon DSS treatment; n = 25 pooled from three independent experiments.

(C) Representative image of colon length from DSS-induced colitis mice and its quantification from non-inflamed control mice (n = 3-4) and adipocyte autophagy-sufficient WT mice and adipocyte autophagy-deficient mice; n = 18-22/group pooled from three independent experiments.

- (D) Representative H&E staining images (10x magnification) of distal colon sections and quantification split by colon side (left panel) and scoring class (right panel) in non-inflamed control mice (n = 4), colitic WT mice and adipocyte autophagy-deficient *Atg7<sup>Ad</sup>* mice; n = 18-22/group pooled from three independent experiments.
- (E) Expression of pro-inflammatory cytokines in lamina propria at 7 days post-DSS induction; n = 18-22/group pooled from three independent experiments.
- (F) Absolute number of immune cells present in the colon at day 7 post-DSS induction; n = 18-22/group pooled from three independent experiments.
- (G) Frequency of myeloid cell population in colon at day 7 post-DSS induction; n = 18-22/group pooled from three independent experiments.
- (H) Absolute number of Ly6C<sup>+</sup> monocytes discriminated by the absence or presence of MHCII for infiltrating and inflammatory monocytes respectively; n = 18-22/group pooled from three independent experiments.

Data are represented as mean  $\pm$  SEM. (B,C,G,H) Two-Way ANOVA. (D,E,F) Unpaired Student's t-test.

**Figure 4: Intestinal inflammation promotes autophagic and fatty acid metabolic transcriptional programs in primary adipocytes.**

- (A) Schematic overview. Three female and three male mice were either kept on water or treated with DSS for seven days. Visceral adipose tissues were collected and digested. Floating adipocyte fraction was collected and sequenced for transcriptional profiling.
- (B) Principal component analysis of all mice revealing a strong sex effect in the overall transcriptome.
- (C) Pathway enrichment analysis of significantly differentially expressed genes in visceral adipocytes during DSS colitis.
- (D) Heatmap representing differentially expressed genes associated with macroautophagy during DSS-induced colitis in visceral adipocytes.
- (E) Heatmap representing differentially expressed genes associated in fatty acid metabolism during DSS-induced colitis in visceral adipocytes.
- (F) Normalized counts of selected key enzymes and proteins involved in the lipolysis pathway in visceral adipocytes; n = 12/group.

Data are represented as mean  $\pm$  SEM. (F) Unpaired Student's t-test.

**Figure 5: Autophagy-deficient adipocytes differentially secrete fatty acids in response to TNF $\alpha$**

- (A) Expression of the gene encoding TNF receptor 1, *Tnfrsf1a*, on visceral adipocytes during intestinal inflammation. Data expressed as normalized counts from transcriptome analysis.
- (B) TNF $\alpha$  levels in serum were measured in wild-type mice at day 7 after water and DSS treatment.
- (C) *Ex vivo* lipolysis assay on *Atg7*-deficient adipose tissue explants simulated with TNF $\alpha$  (100ng/mL) for 24h before replacing with fresh medium in the absence of TNF $\alpha$  for 3h; n = 4 representative for two independent experiments.
- (D) Serum levels of circulating FFAs measured in wild-type and *Atg7*-deficient mice; n = 13-14 pooled from two independent experiments.
- (E) Fraction of major FFA species in mouse serum in water-treated and DSS-treated mice; n = 12-14 pooled from two-three independent experiments.
- (F) Fold change differences in serum quantities of FFA species in water-treated and DSS-treated mice; n = 12-14 pooled from two-three independent experiments.
- (G) Representative plots of CD36 expression on adipose tissue macrophages isolated from mesenteric or visceral adipose tissues at day 7 after DSS-treatment. Representative for three independent experiments.

Data are represented as mean  $\pm$  SEM. (B,C,E,F,G) Two-Way ANOVA. (A,D) Unpaired Student's t-test.

**Figure 6: Adipocyte autophagy controls IL-10 secretion from mesenteric and visceral adipose tissues upon DSS-induced colitis**

(A) Serum cytokines upon DSS-induced colitis at day 7 post-induction; n = 17-23/group pooled from three independent experiments.

(B) Expression of cytokines in lamina propria measured by qRT-PCR at 7 days post-DSS induction; n = 20-24/group pooled from three independent experiments.

(C) Colitis was induced in mice for 7 days and mesenteric adipose tissue explants were cultured with FBS. IL-10 secretion into the supernatant was measured after 24h of culture; n = 4-12/group pooled from two independent experiments.

(D and E) Colitis was induced in mice for 7 days and adipose tissues were extracted and cultured for 6 hours in serum-starved medium. Secretion of (D) IL-10 and (E) TNF $\alpha$  from mesenteric (left panel) and gonadal adipose tissues (right panel) was measured by ELISA. Shapes identify individual experiments; n = 5-15/group pooled from two independent experiments.

(F) Identification of IL-10-producing cells in adipose tissue upon DSS-induced colitis by flow cytometry. Representative FACS plots (left panel) and quantification from mesenteric (middle panel) and visceral adipose tissues (right panel); n = 7-9/group pooled from two independent experiments.

(G) Identification of IL-10 producing cells in adipose tissues of WT and *Atg7<sup>Ad</sup>* mice upon DSS-induced colitis at day 7. Representative FACS plots (left panel) and quantification from mesenteric (middle panel) and visceral adipose tissue (right panel); n = 3-9/group from one independent experiment.

Data are represented as mean  $\pm$  SEM. (A,F) Two-Way ANOVA. (B) One-Way ANOVA. (D,E) Two-Way ANOVA with regression for experiment. (C) Unpaired Student's t-test.

**Figure 7: FFA restriction impairs IL-10 production in macrophages.**

(A) Measuring FFA content in either full medium supplemented with 10% FBS ( $R_{10}$ ), or without FBS ( $R_0$ ), or with 10% Charcoal-treated FBS ( $R_{Charcoal}$ ); n = 5/group pooled from two independent experiments.

(B) Bone marrow derived macrophages were differentiated for 7 days in M-CSF until polarized using LPS and IFN $\gamma$ . Surface expression of fatty acid uptake transporter CD36 on M0 or M1 polarized macrophages; n = 4/group representative for three independent experiments.

(C) Correlation of CD36 surface expression and medium FFA concentration; n = 4 pooled from two independent experiments.

(D) Bone marrow derived macrophages were polarized in M-CSF or LPS/IFN $\gamma$  for 16 hours, before stimulated with PMA/Ionomycin. TNF $\alpha$  (upper panel) and IL-10 (lower panel) production was measured after 4 hours of PMA/ionomycin stimulation by flow cytometry; n = 3-4/group representative for two independent experiments.

(E) Secreted cytokines into culture supernatant were measured by ELISA 16 hours after macrophage polarization with M-CSF or LPS/IFN $\gamma$ .

Data are represented as mean  $\pm$  SEM. (A) One-Way ANOVA. (B,D,E) Two-Way ANOVA. (C) Linear regression.



**Supplementary Figure 1: Low DSS concentration leads to efficient induction of intestinal inflammation.**

- (A) Representative H&E staining of colon histology and quantification at day 7 after DSS colitis induction; n=3/group, representative for one experiment
- (B) Colon length measured after 1.5-2% DSS colitis regime at day 7; n=6-7 pooled from two experiments
- (C) Spleen weight and mesenteric lymph node weight after 1.5% colitis regime at day 7; n=9/group pooled from three experiments
- (D) Absolute number of colonic CD45<sup>+</sup> immune cells at day 7 post-DSS treatment; n=6-7 pooled from two experiments.
- (E) Frequency of CD11b<sup>+</sup> myeloid cells, CD3<sup>+</sup> T cells and CD19<sup>+</sup> B cells in colon at day 7 post-DSS treatment; n=6-7 pooled from two experiments.

Data are represented as mean  $\pm$  SEM. (A,B,D,E) Unpaired Student's t-test. (C) Multiple t-test.

**Supplementary Figure 2: Adipose tissue immune homeostasis is maintained despite loss of adipocyte autophagy.**

- (A) Body weight development upon tamoxifen treatment; n=10-11/group pooled from two independent experiments.
- (B) Weight of mWAT and collective visWAT divided per sex two weeks after tamoxifen treatment; n=10-11/group pooled from two independent experiments.
- (C) Gating strategy of adipose tissue myeloid cells.
- (D) Frequency of CD45<sup>+</sup> immune cells in mesenteric and visceral adipose tissues two weeks after tamoxifen treatment; n=10-11/group pooled from two independent experiments.
- (E) Frequency of myeloid cell populations two weeks after tamoxifen treatment in mesenteric and visceral adipose tissues; n=10-11/group pooled from two independent experiments.
- (F) Gating strategy of adipose tissue lymphoid cells.
- (G) Frequency of lymphoid cell populations two weeks after tamoxifen treatment in mesenteric and visceral adipose tissues; n=10-11/group pooled from two independent experiments.
- (H) Frequency of T cell subsets two weeks after tamoxifen treatment in mesenteric and visceral adipose tissues; n=10-11/group pooled from two independent experiments.

Data are represented as mean  $\pm$  SEM. (A-B, D-E,G-H) Two-Way ANOVA.

**Supplementary Figure 3: Expansion of intestinal Treg populations is blunted in adipocyte autophagy-deficient mice without affecting intestinal resolution.**

- (A) Schematic of experimental design. Sex-matched and age-matched littermates were treated with DSS for five days and mice were sacrificed 14 days after start of DSS treatment.
- (B) Colon length from non-inflamed control mice (n = 8), adipocyte autophagy-sufficient WT mice and adipocyte autophagy-deficient mice (n = 12), pooled from two independent experiments.
- (C) Representative H&E staining images (10x magnification) of distal colon sections and quantification of histopathological score; n=7-13 pooled from two independent experiment.
- (D) Frequency (left panel) and absolute number (right panel) of CD4<sup>+</sup> FOXP3<sup>+</sup> cells in the colon at day 14 post-DSS treatment; n = 8-11 pooled from two independent experiments.
- (E) Frequency of peripheral and thymic Treg (pTreg and tTreg, respectively) cell populations in colon at day 14 post-DSS treatment; n = 6-11 pooled from two independent experiments.

Data are represented as mean  $\pm$  SEM. (B-D) Two-Way ANOVA. (E) One-Way ANOVA.

**Supplementary Figure 4: Loss of adipocyte autophagy does not alter *Helicobacter hepaticus*-induced intestinal inflammation.**

- (A) Schematic of experimental design. Sex-matched and age-matched littermates were treated with *Hh* and anti-IL10 receptor antibody 14 days after last tamoxifen administration. *Hh* was administered at the one day and anti-IL10 receptor seven days after the first administration. Colitis was assessed after two weeks (inflammation timepoint) and after six weeks (resolution timepoint).

- (B) Representative H&E staining images (10x magnification) of distal colon sections and quantification of histopathological score; n=4-14/group pooled from two independent experiments.
- (C) Absolute number of CD45<sup>+</sup> immune cells in lamina propria 14 days after induction of colitis; n = 7-13/group pooled from two independent experiments.
- (D) Frequency of immune cell populations in the lamina propria 14 days after induction of colitis; n = 7-13/group pooled from two independent experiments.
- (E) Absolute number of T cell populations in the lamina propria 14 days after induction of colitis; n = 7-13/group pooled from two independent experiments.
- (F) Absolute number of CD45<sup>+</sup> immune cells in lamina propria 6 weeks after induction of colitis; n = 4-13/group pooled from two independent experiments.
- (G) Frequency of immune cell populations in the lamina propria 6 weeks after induction of colitis; n = 4-13/group pooled from two independent experiments.
- (H) Absolute number of T cell populations in the lamina propria 6 weeks after induction of colitis; n = 4-13/group pooled from two independent experiments.

Data are represented as mean  $\pm$  SEM. (B,D-E,G) Two-Way ANOVA, (F) One-Way ANOVA.

**Supplementary Figure 5: Limited impact of *Atg7* deficiency on transcriptional profile in visceral adipocytes.**

- (A) Differential gene expression in visceral adipocytes from water-treated WT and *Atg7<sup>Ad</sup>* animals two weeks after tamoxifen treatment.
- (B) Differential gene expression in visceral adipocytes from DSS-treated WT and *Atg7<sup>Ad</sup>* animals at day 7 post-DSS treatment.
- (C) Differential gene expression assessing transcriptional changes associated with DSS-induced inflammation after regressing effect of sex and genotypes in visceral adipocytes.
- (D) Normalized counts of selected *Atg8* homologues in visceral adipocytes 7 days after induction of colitis; n = 12/group.

Data are represented as mean  $\pm$  SEM. (D) Unpaired Student's t-test.

**Supplementary 6: Systemic lipid homeostasis and intestinal CD36 expression remain largely unaltered in adipocyte autophagy-deficient mice during DSS-induced colitis.**

- (A) *Ex vivo* lipolysis assays on *Atg7*-deficient adipose tissue explants simulated with isoproterenol (10 $\mu$ M) for 1-2h; n = 4-5/group representative for three independent experiments.
- (B) Gene expression of cytosolic lipases in visceral adipocytes upon DSS-induced colitis.
- (C) Principal component analysis of serum lipidome of DSS-treated mice; n=5-6/group pooled from two independent experiments.
- (D) Differentially expressed lipids in serum of DSS-treated mice before FDR correction (in black) and after FDR correction (in red); n=5-6/group pooled from two independent experiments.
- (E) Principal component analysis of serum lipidome of water vs. DSS-treated mice; n=11-12/group pooled from two independent experiments.
- (F) Expression of CD36 was measured by flow cytometry at day 7 post-DSS induction on intestinal immune cells; n = 6-10/group pooled from two independent experiments.

Data are represented as mean  $\pm$  SEM. (A) Two-Way ANOVA. (B) Unpaired Student's t-test. (F) One-Way ANOVA.

**Supplementary Figure 7: Mesenteric adipose tissues alter their cytokine profile upon DSS- and *Hh*-induced colitis in wild-type animals.**

Secreted cytokines from wild-type mWAT cultured in medium containing 5% FBS for 24h which are (A) increased to a similar degree in both DSS- and *Hh*-induced colitis, (B) increased specifically in *Hh*-induced colitis, (C) increased in both colitis models, but more significantly in *Hh*-induced colitis and (D) not induced at all.

Data are represented as mean  $\pm$  SEM. Statistical analysis by One-Way ANOVA from one (*Hh*) and two (DSS) independent experiments; each datapoint is one biological replicate.

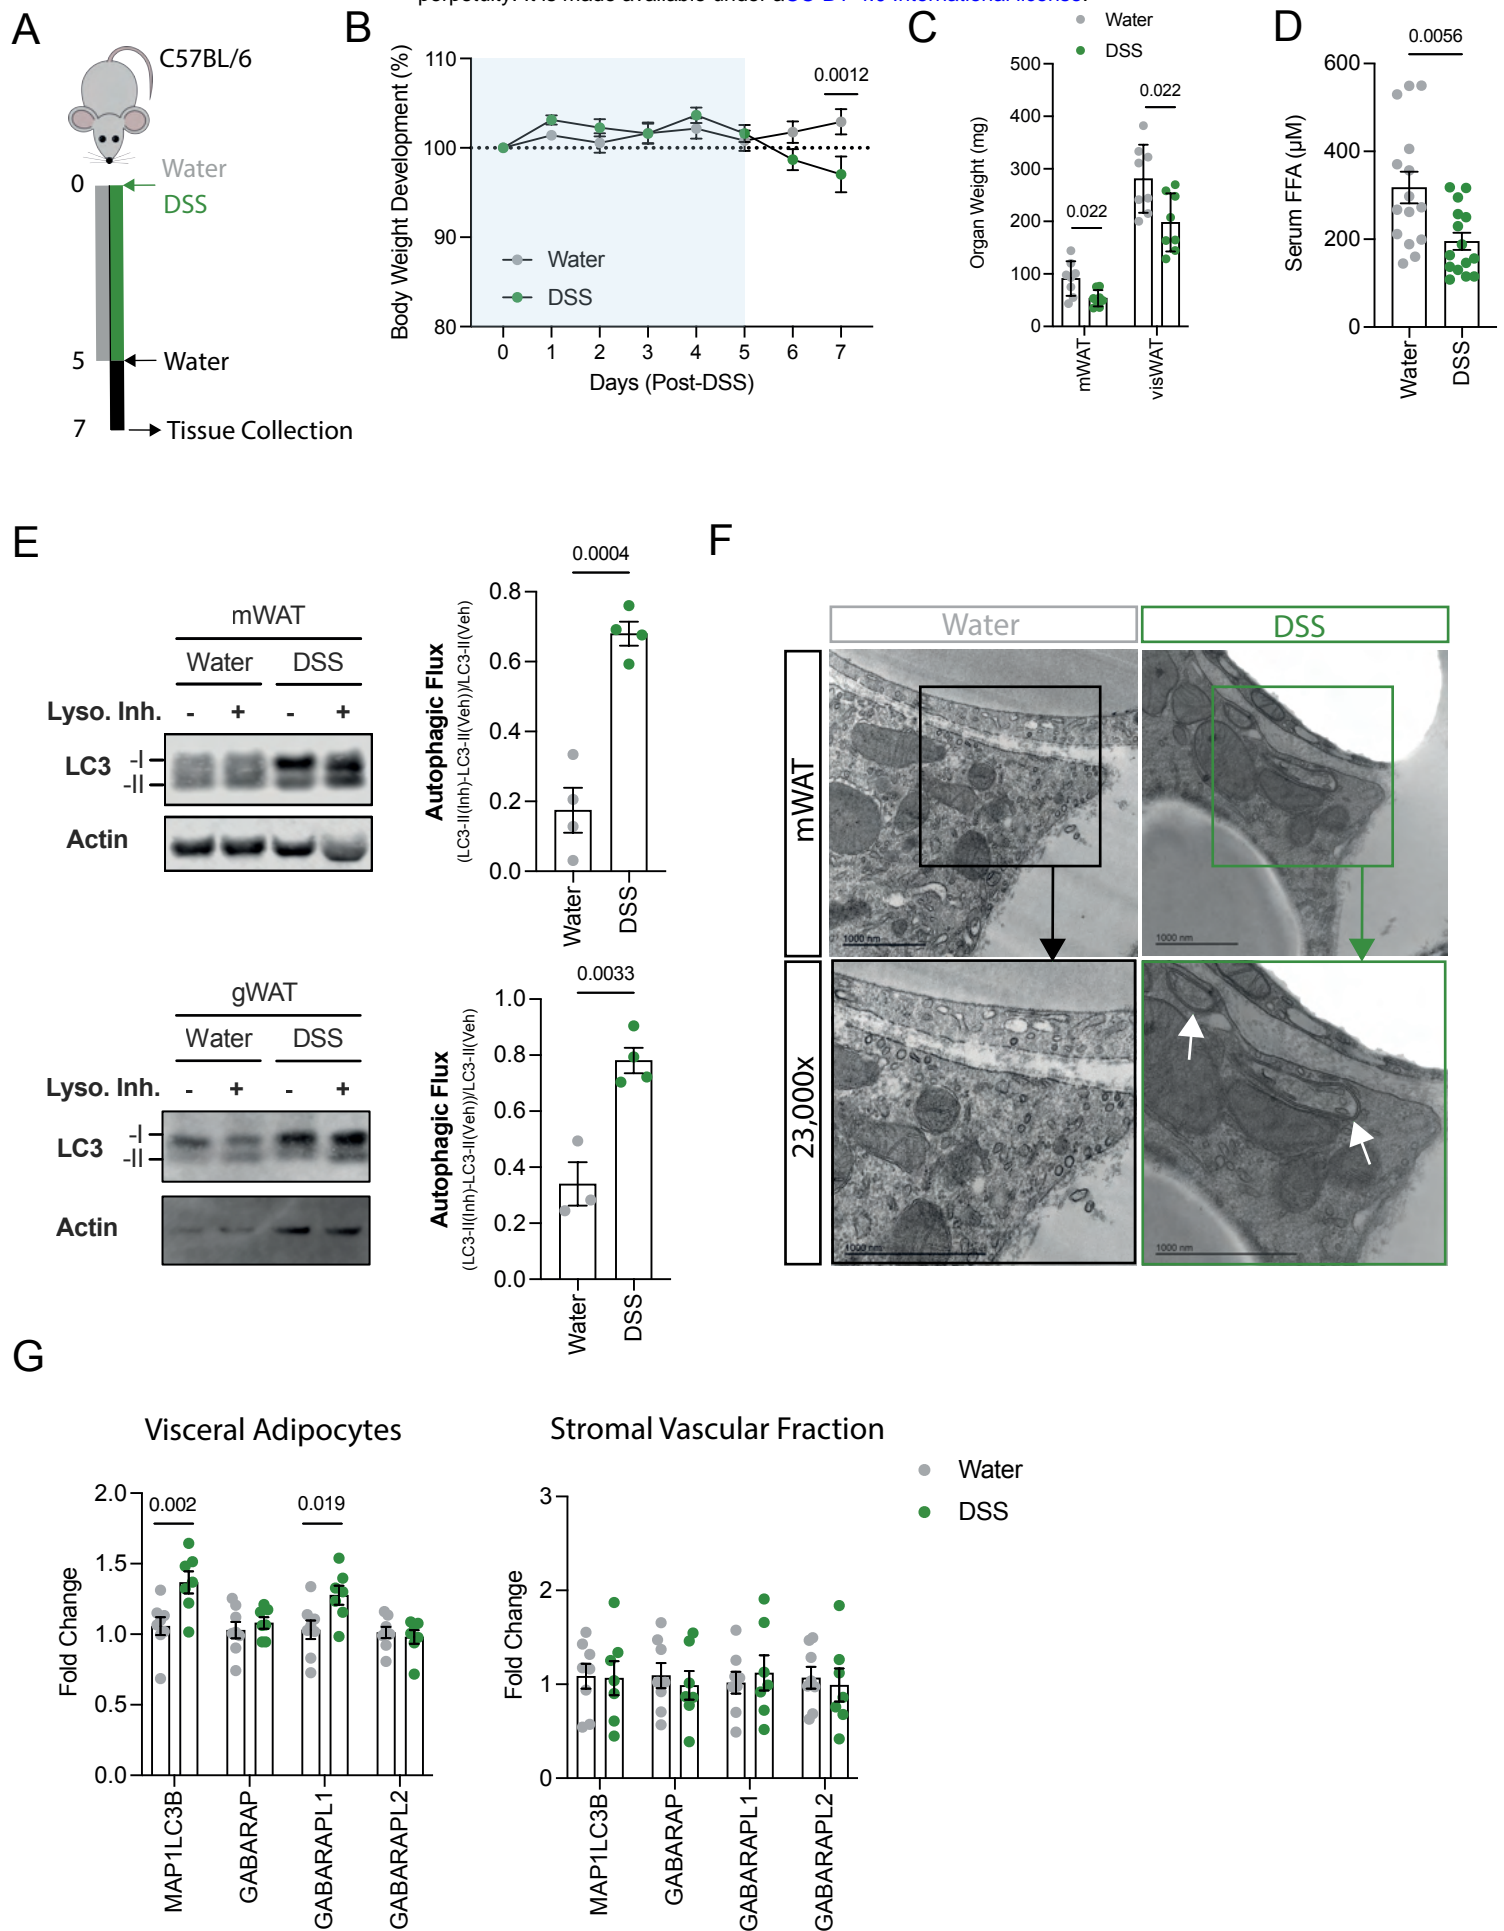

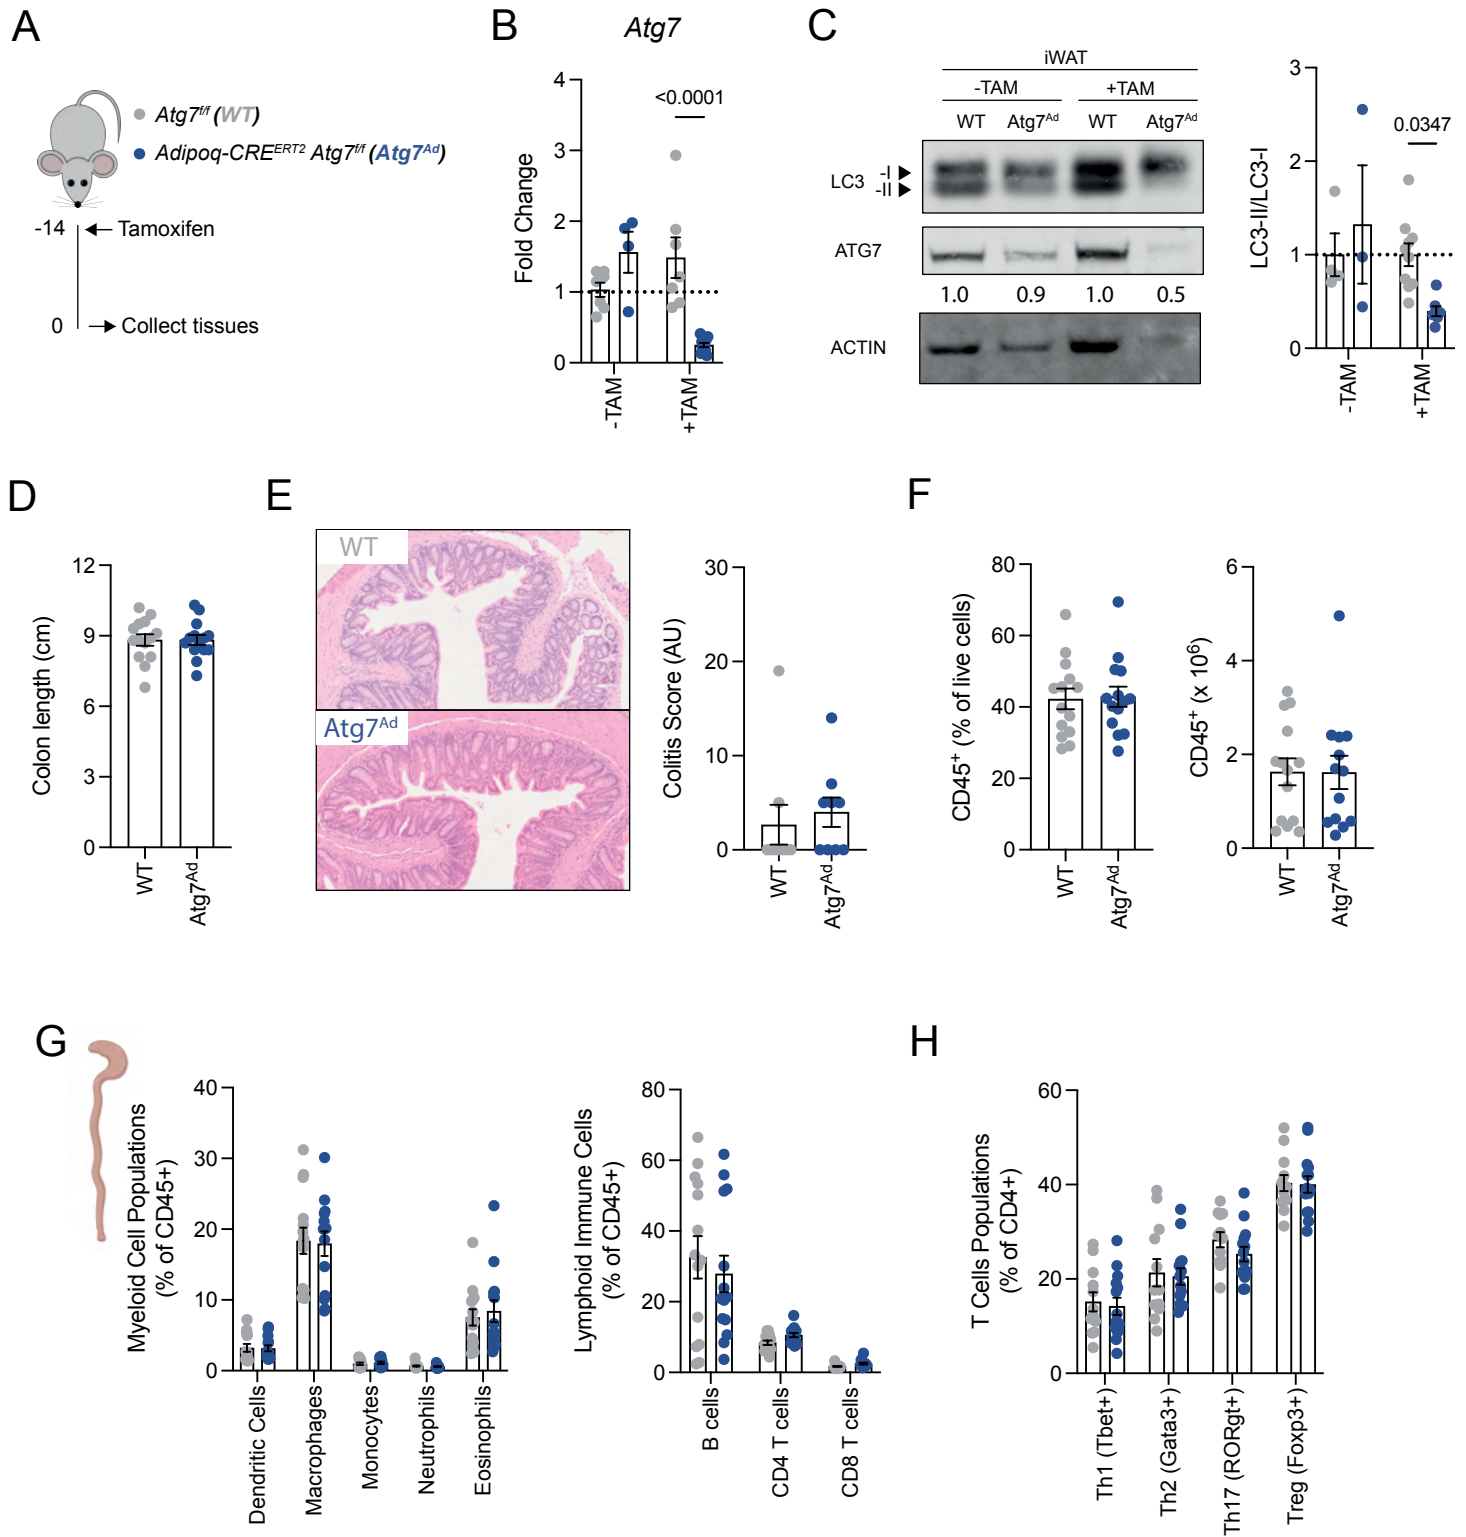

Figure 3

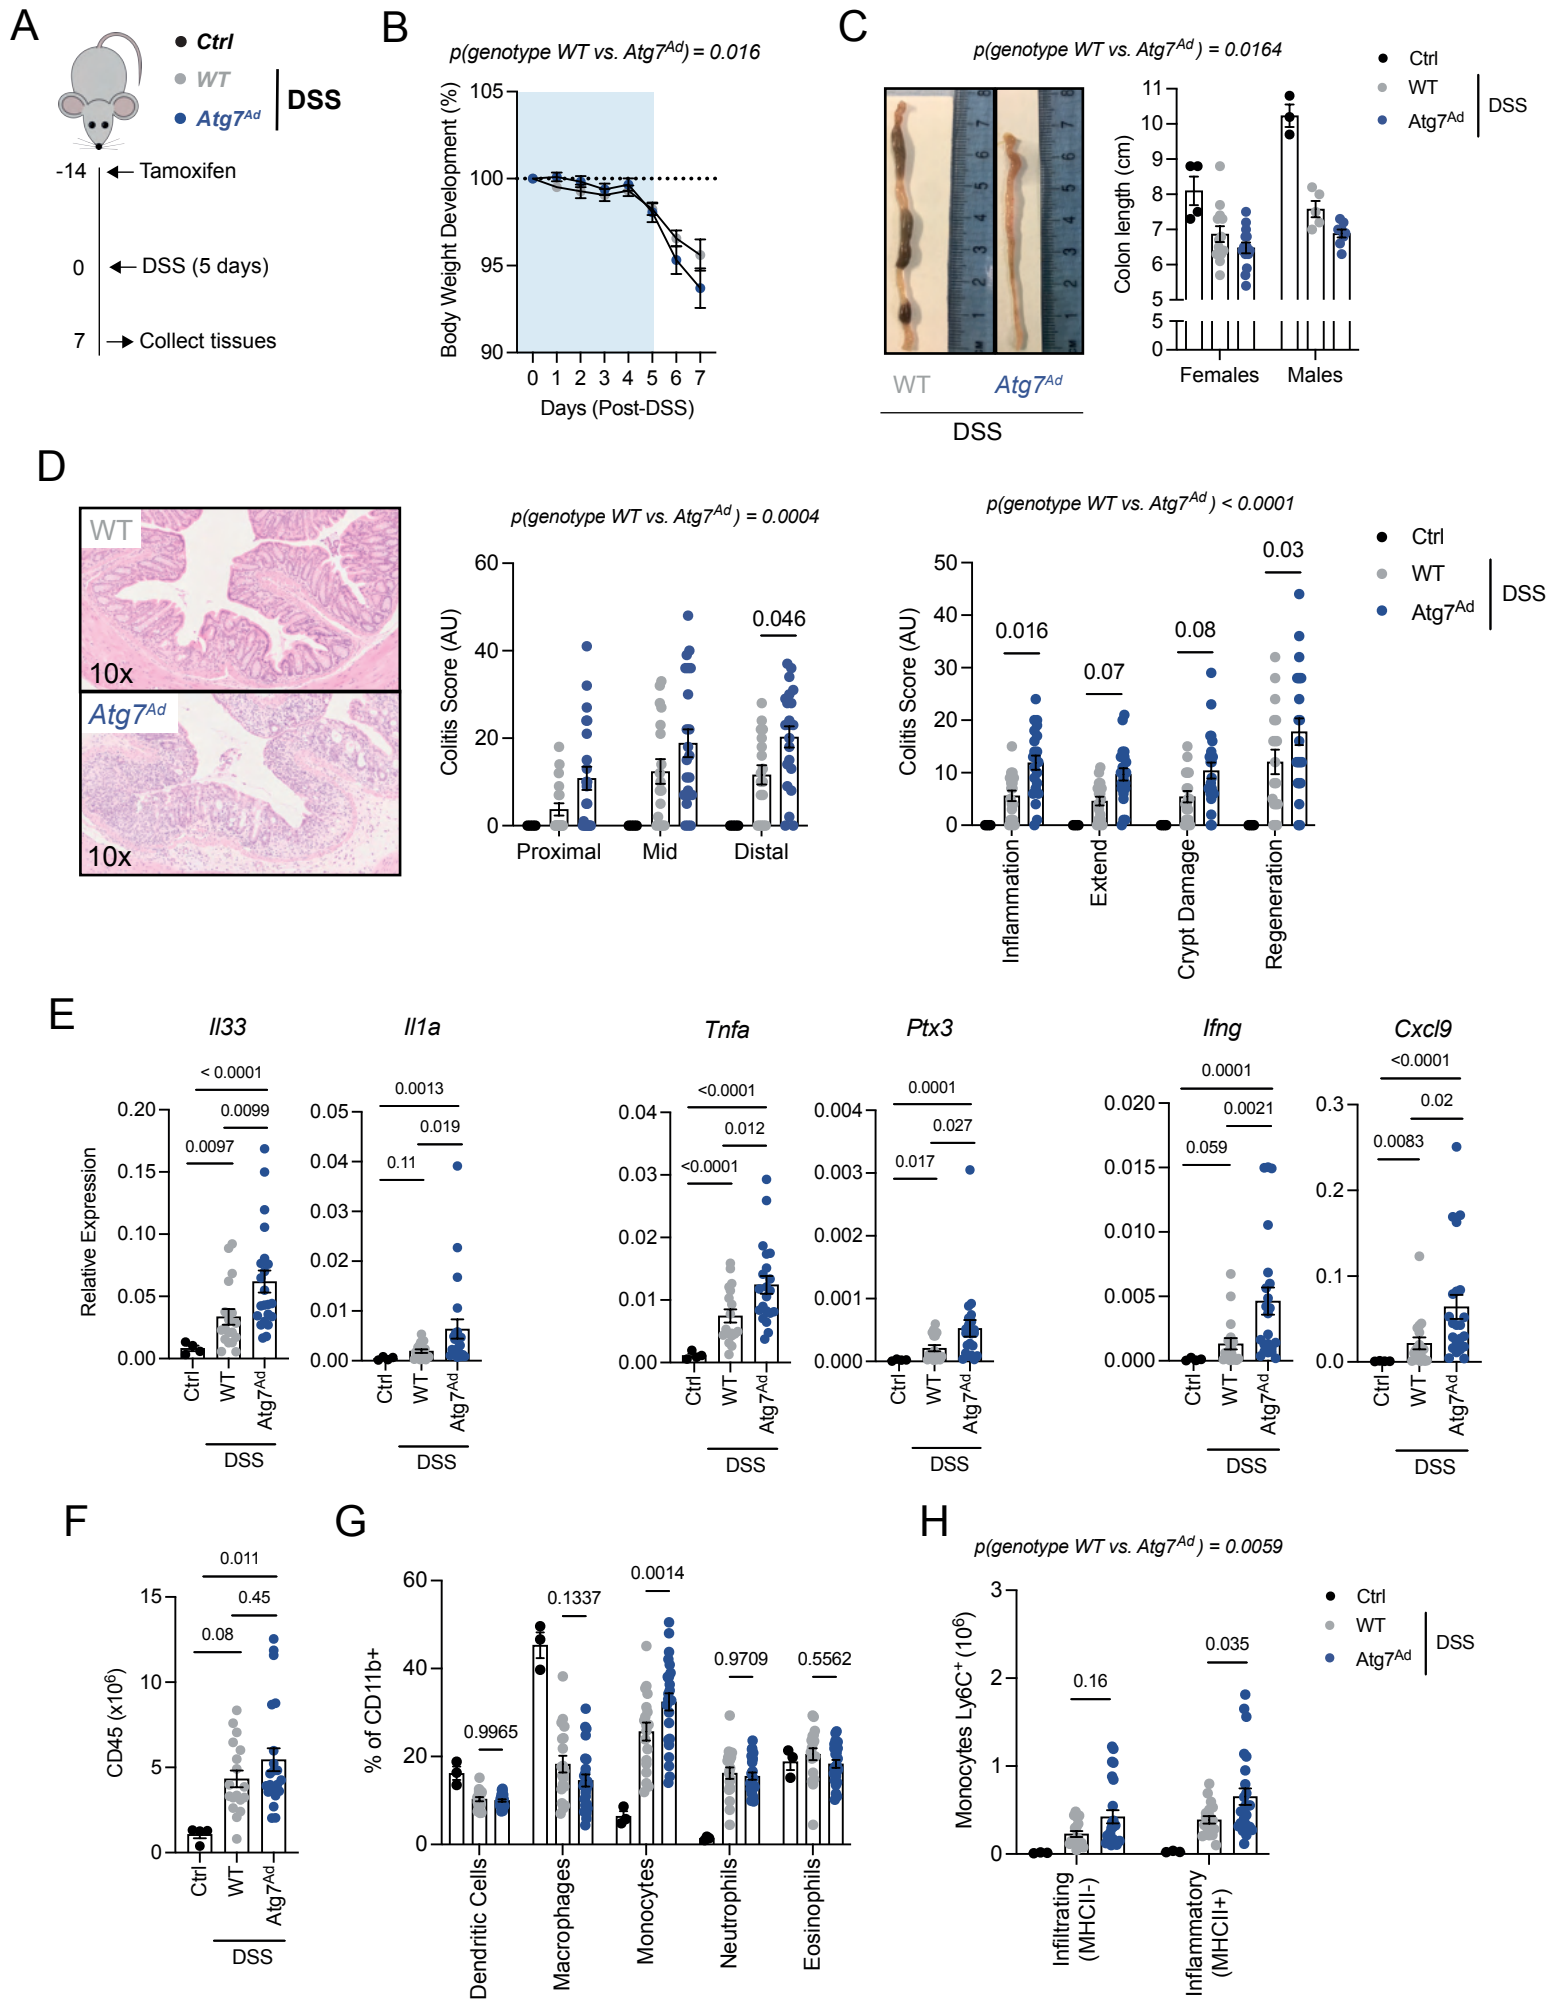

Figure 4

A

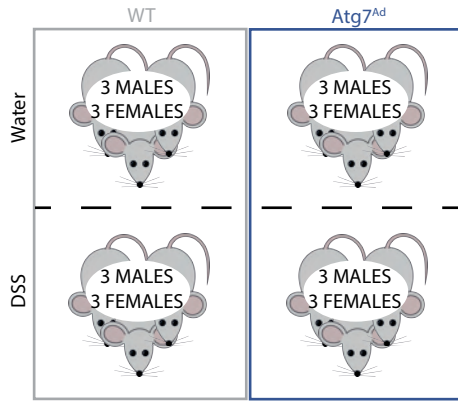

B

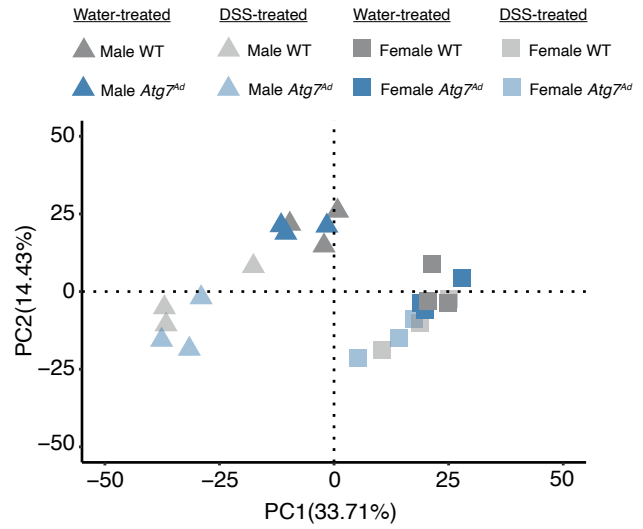

C

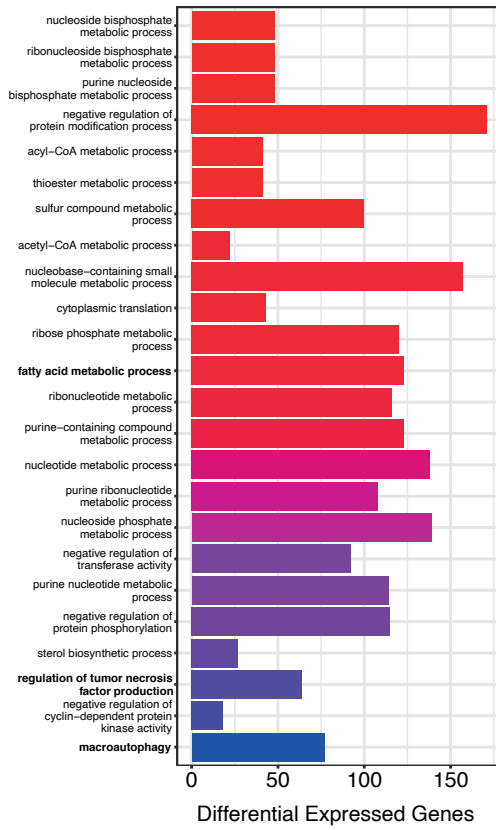

D

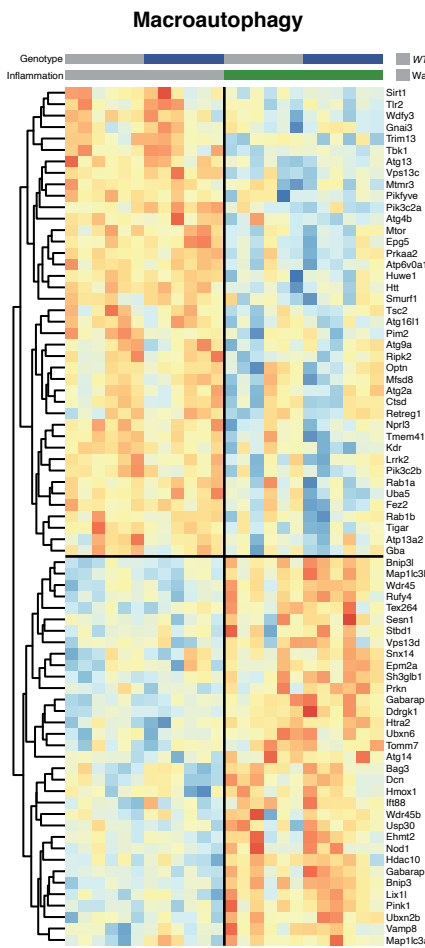

E

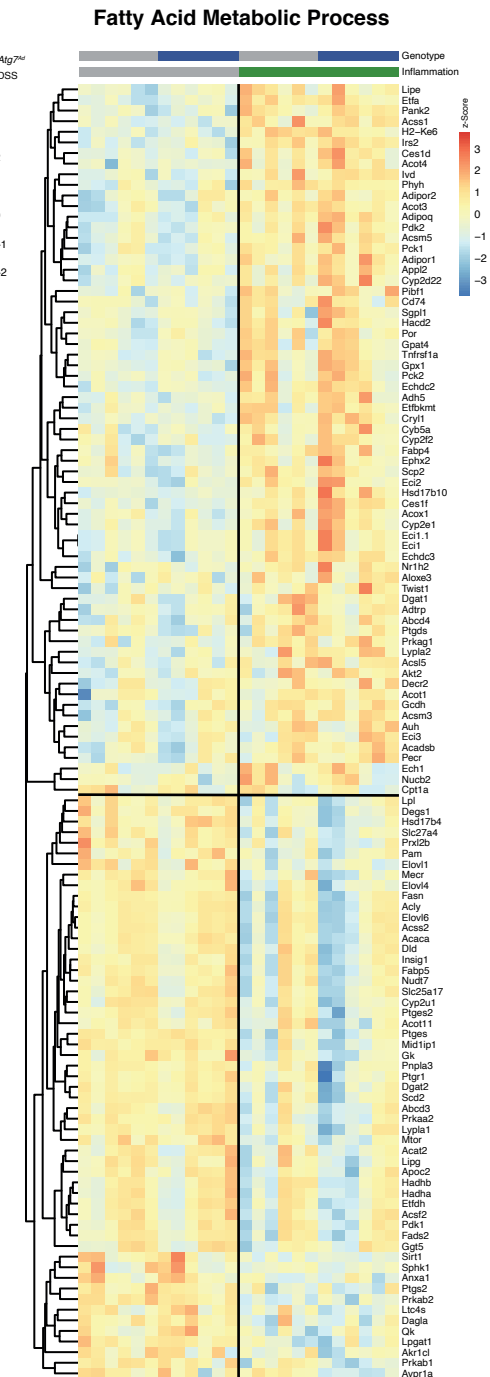

F

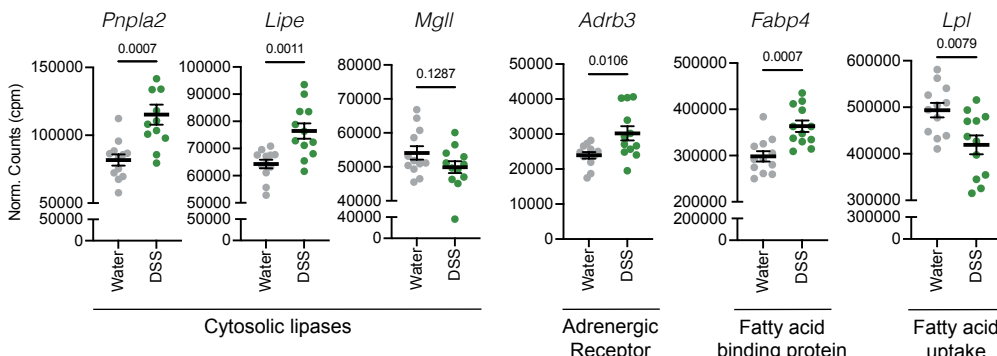

Figure 5

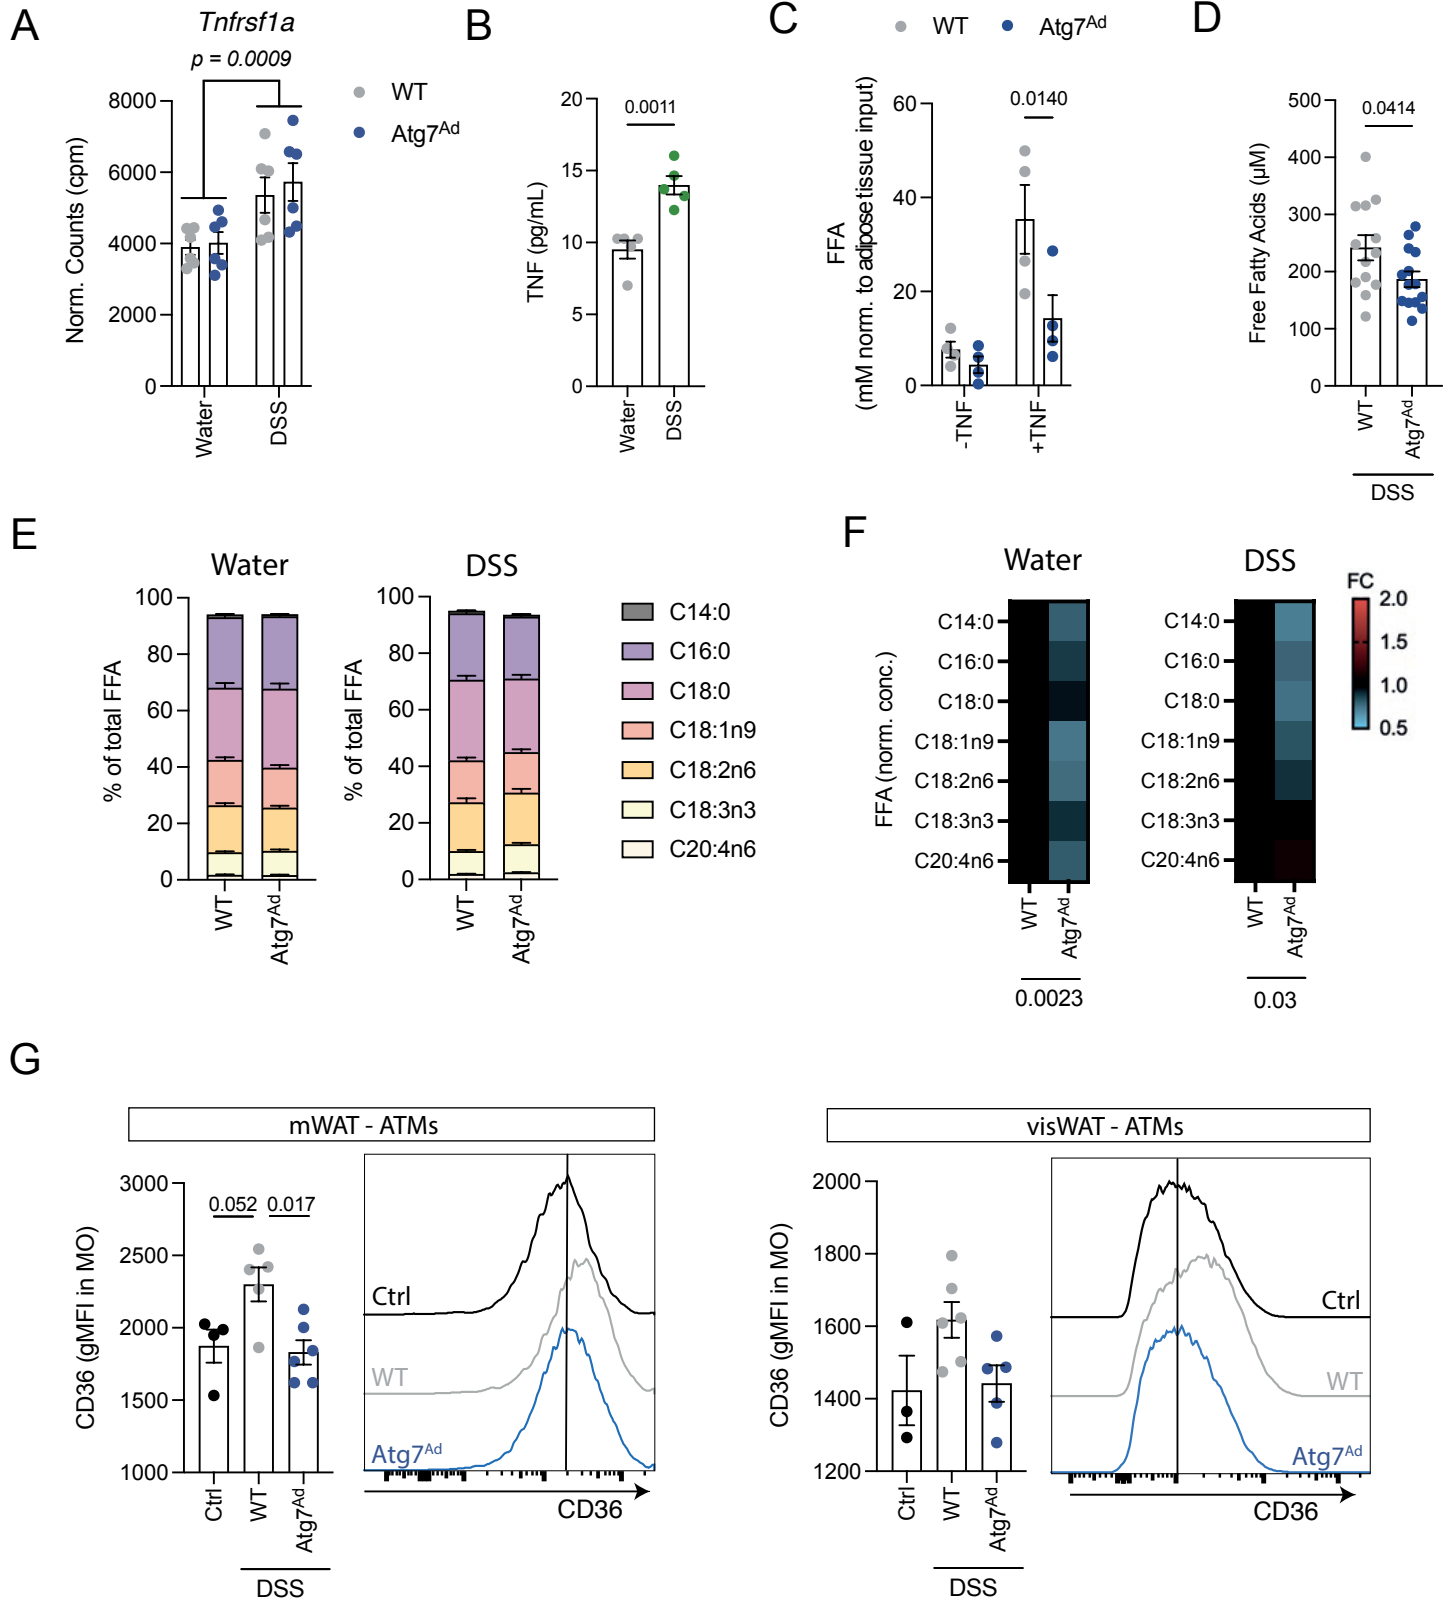

Figure 6

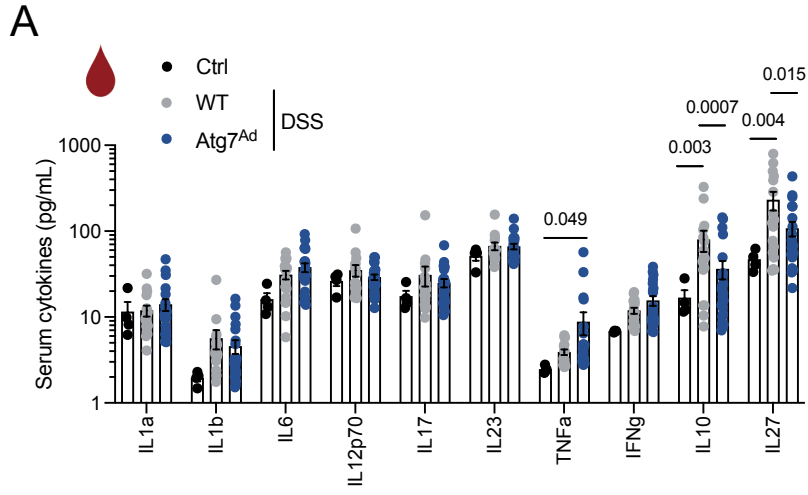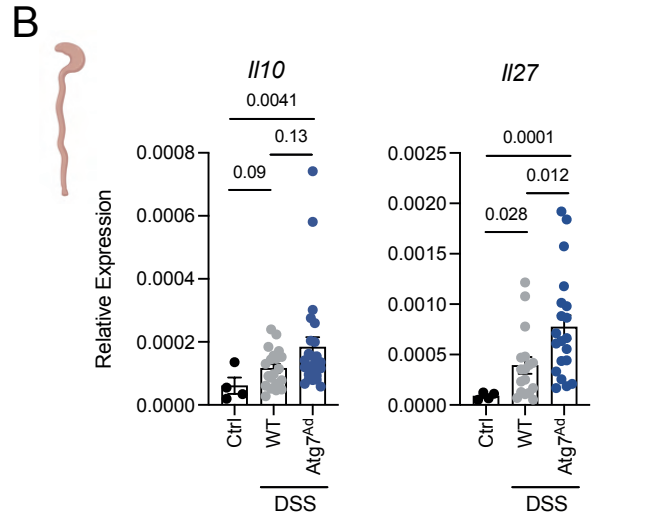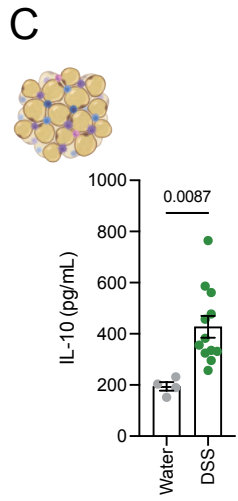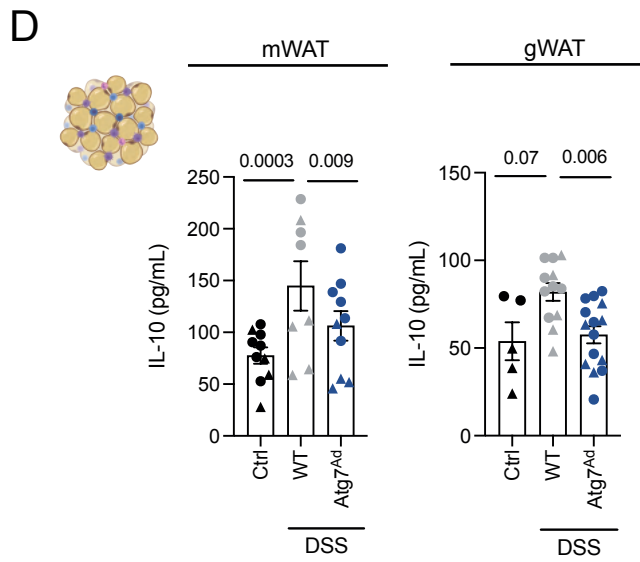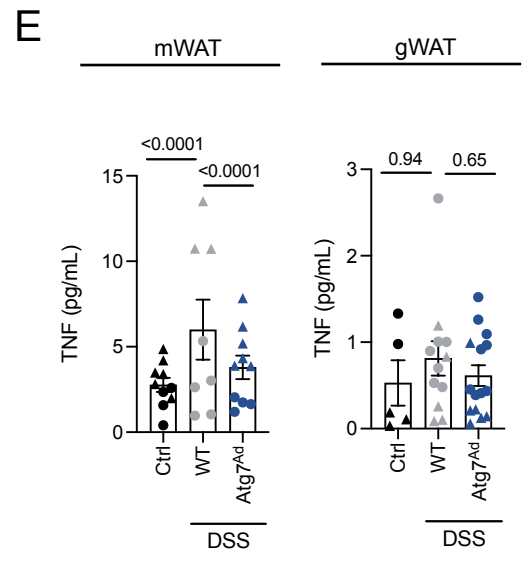



Figure 7

A

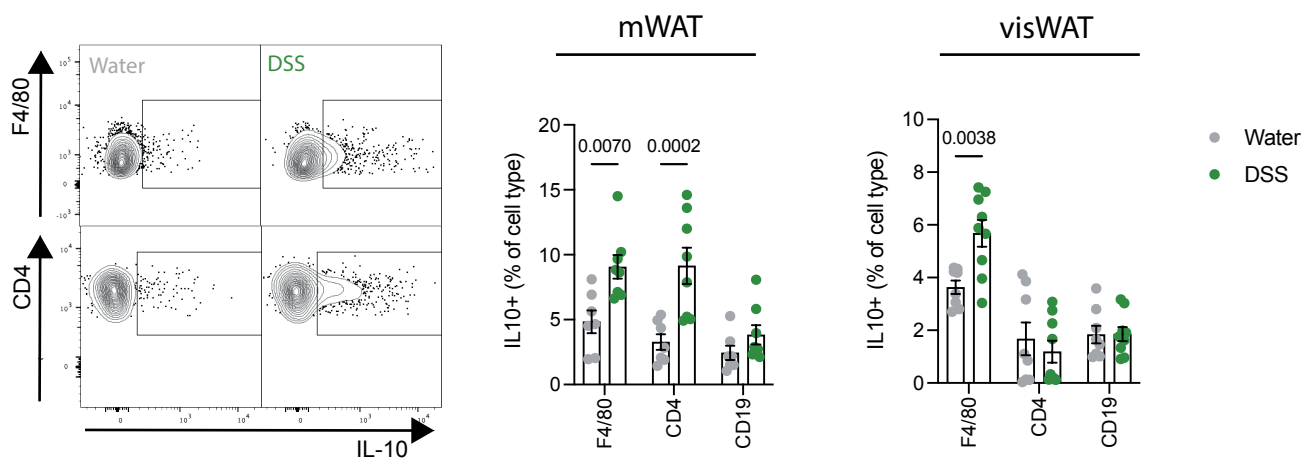

B

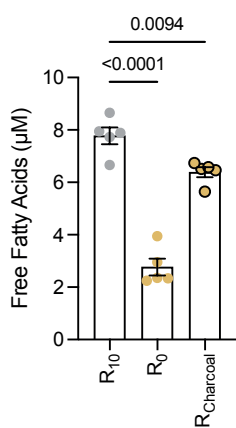

C

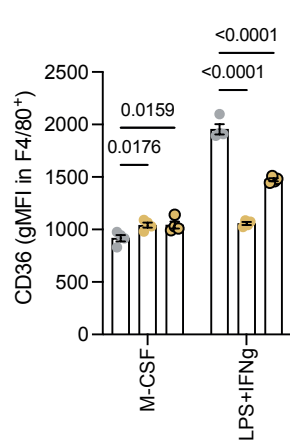

D

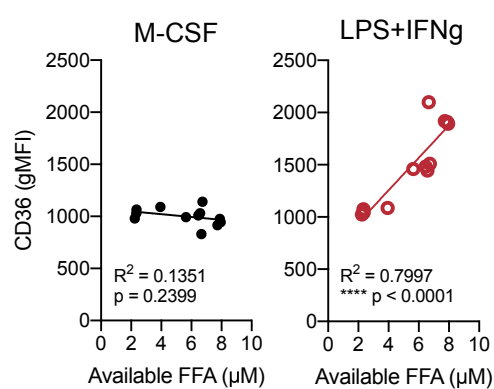

E

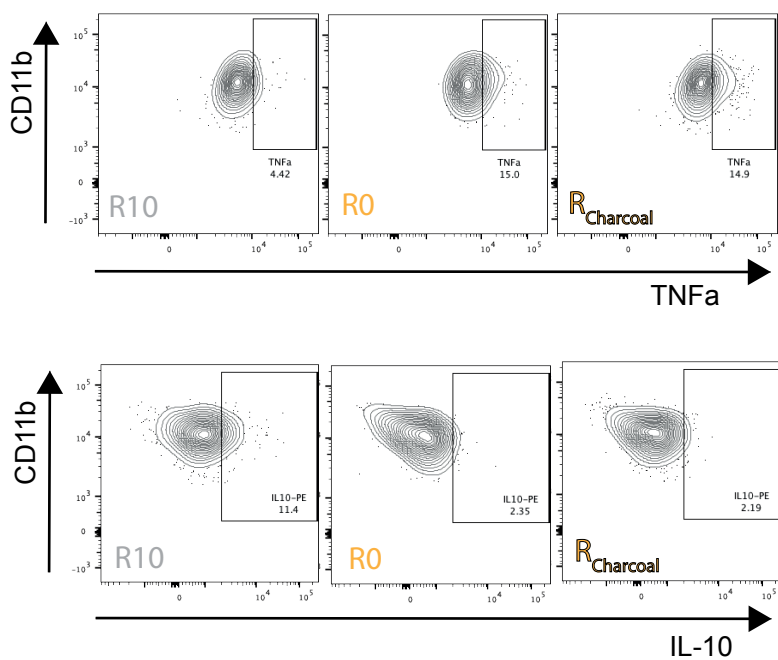

F

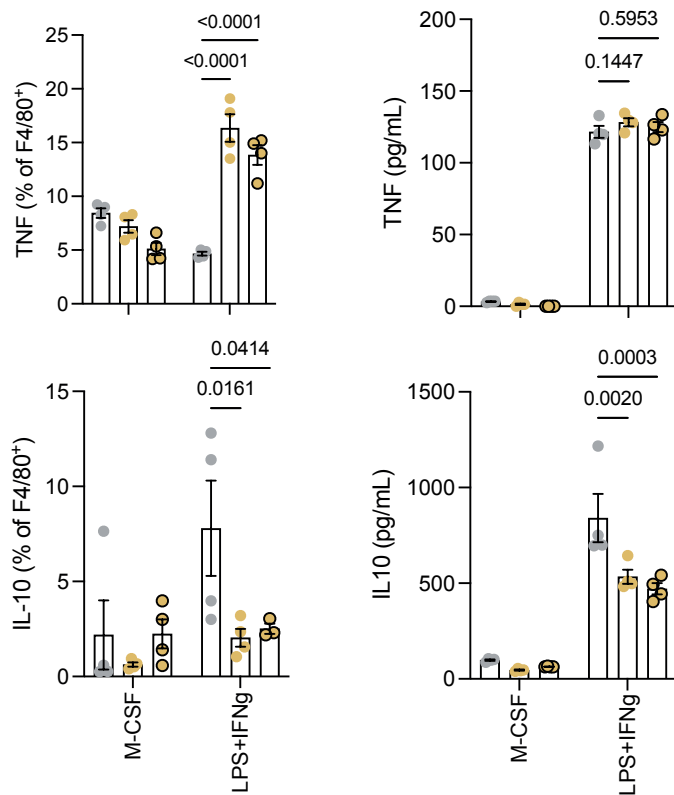

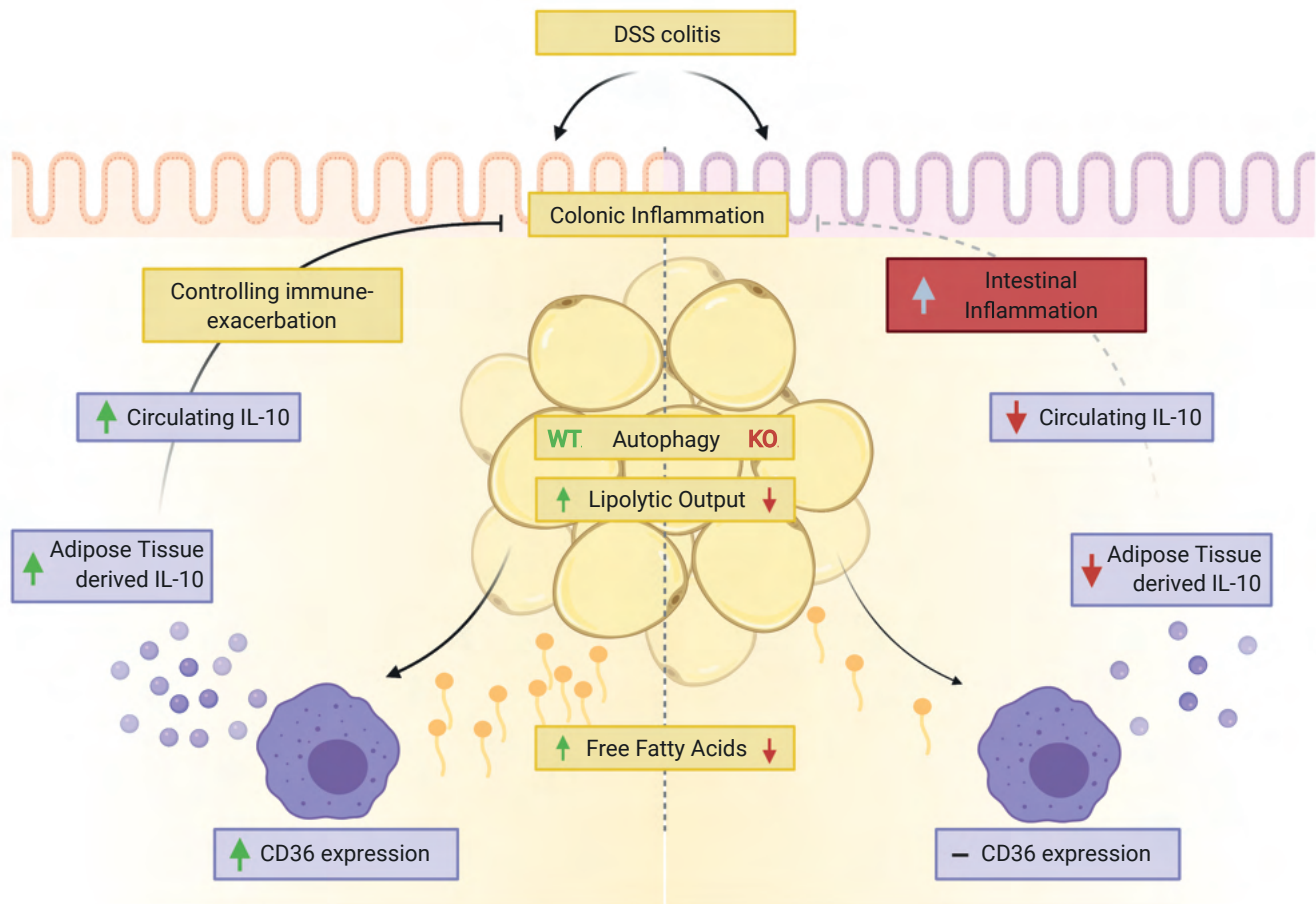

Source: https://www.biorxiv.org/content/10.1101/2021.10.25.465200v1.full.pdf
